# Supplementary material for: Intelligent Predictive Risk Assessment and Management of Sarcopenia in Chronic Disease Patients Using Machine Learning and a Web-Based Tool
Source: Research Square preprint supplement (doi:10.21203/rs.3.rs-6161594/v1), 2025-04-15

## Supplementary file1

**Figure S1:** Interaction effects of characteristics with time in GLMM.

**Figure S2:** Learning curves of machine learning algorithms.

**Figure S3:** Calibration plots of machine learning algorithms in the training set.

**Figure S4:** Calibration plots of machine learning algorithms in the test set.

**Figure S5:** Cross-validation ROC and PR AUC plots of machine learning models:  
ROC

AUC plots (A), PR AUC plots (B).

**Figure S6:** Visualization of hyperparameter tuning results for the MLP model.

**Figure S7:** Illustration of the neural network structure.

**Figure S1:** Interaction effects of characteristics with time in GLMM.

Gender

wave

GenderMale

wave:GenderMale

-2

-1

0

Effect difference

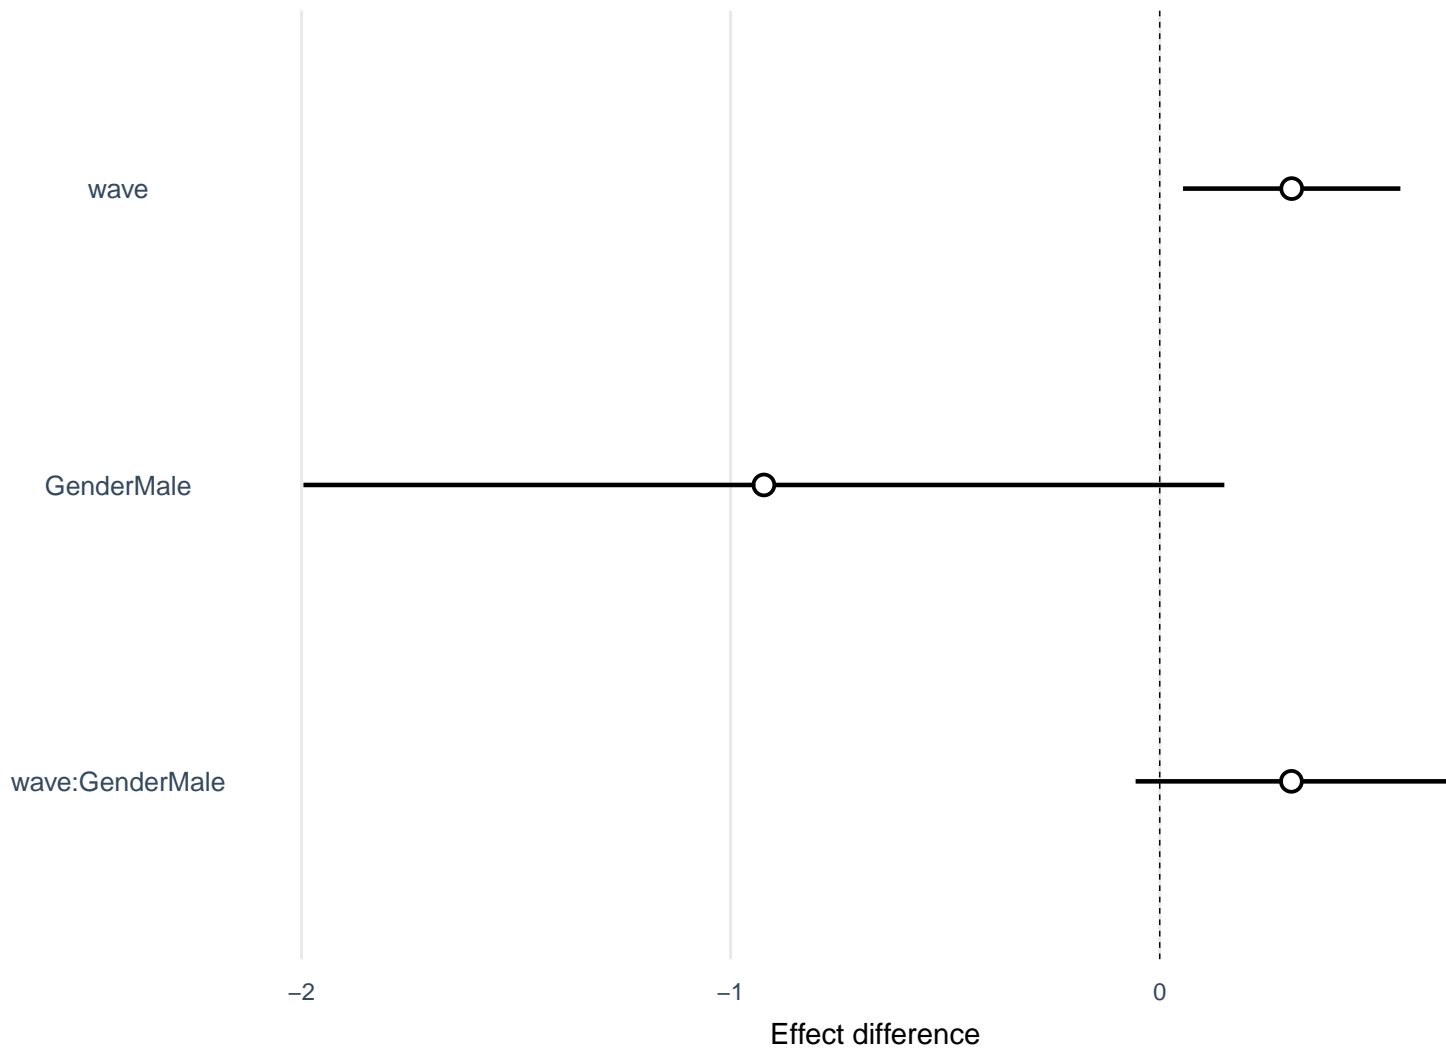

# Smoking\_status

wave

Smoking\_statusFormer

Smoking\_statusNever

wave:Smoking\_statusFormer

wave:Smoking\_statusNever

-4

-2

0

Effect difference

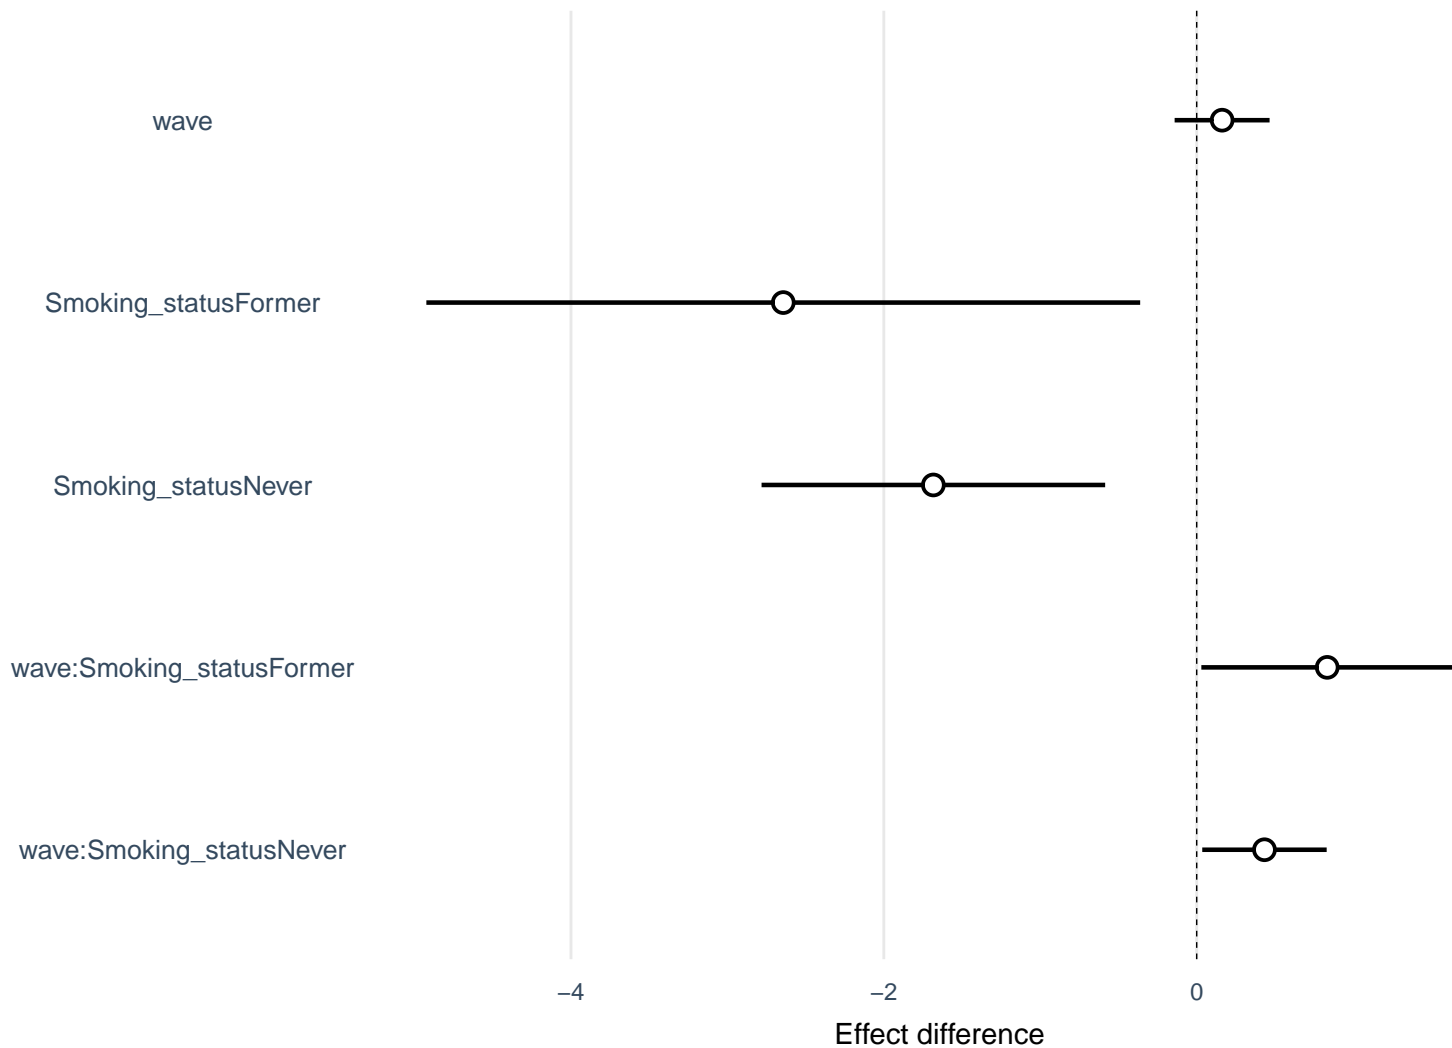

# Education\_status

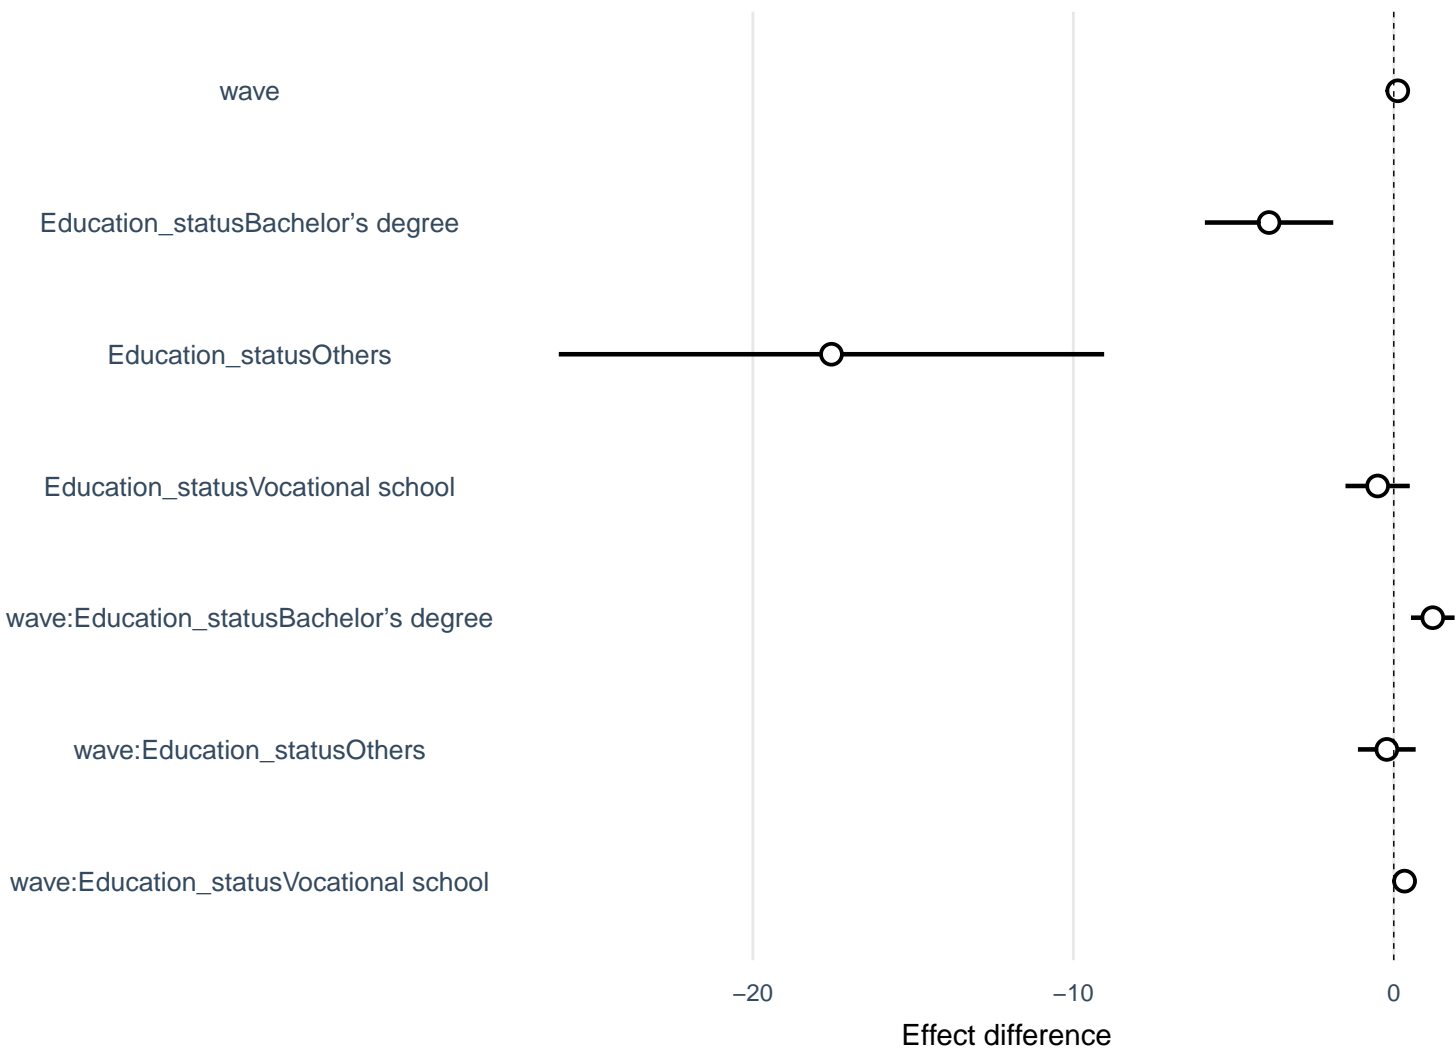

Hypertension

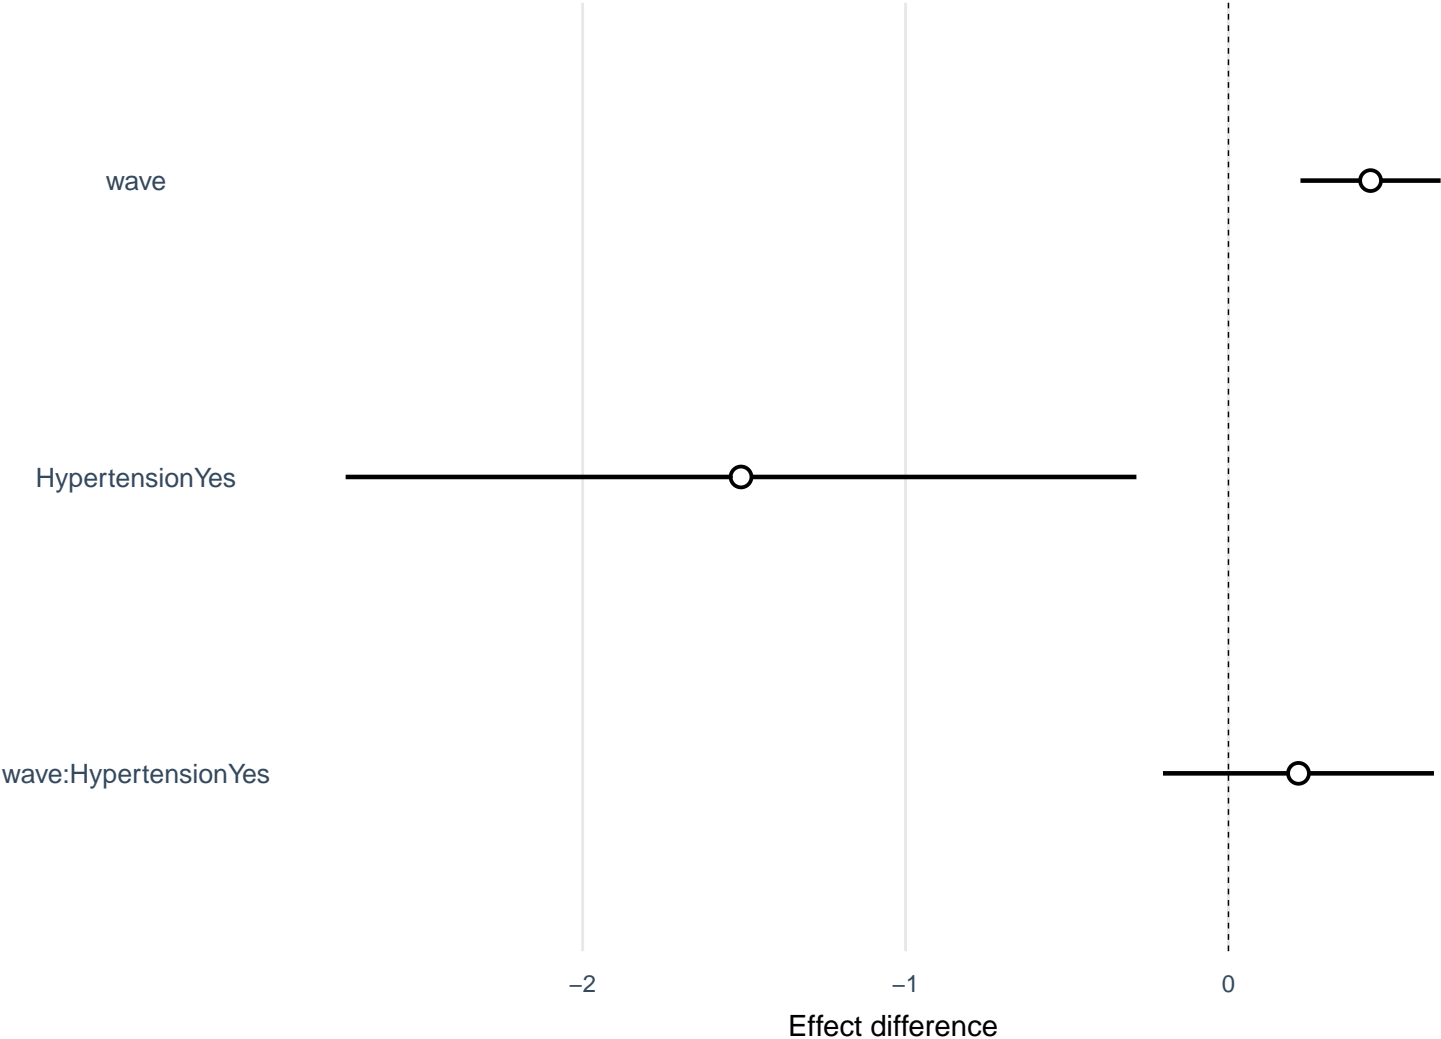

# Diabetes

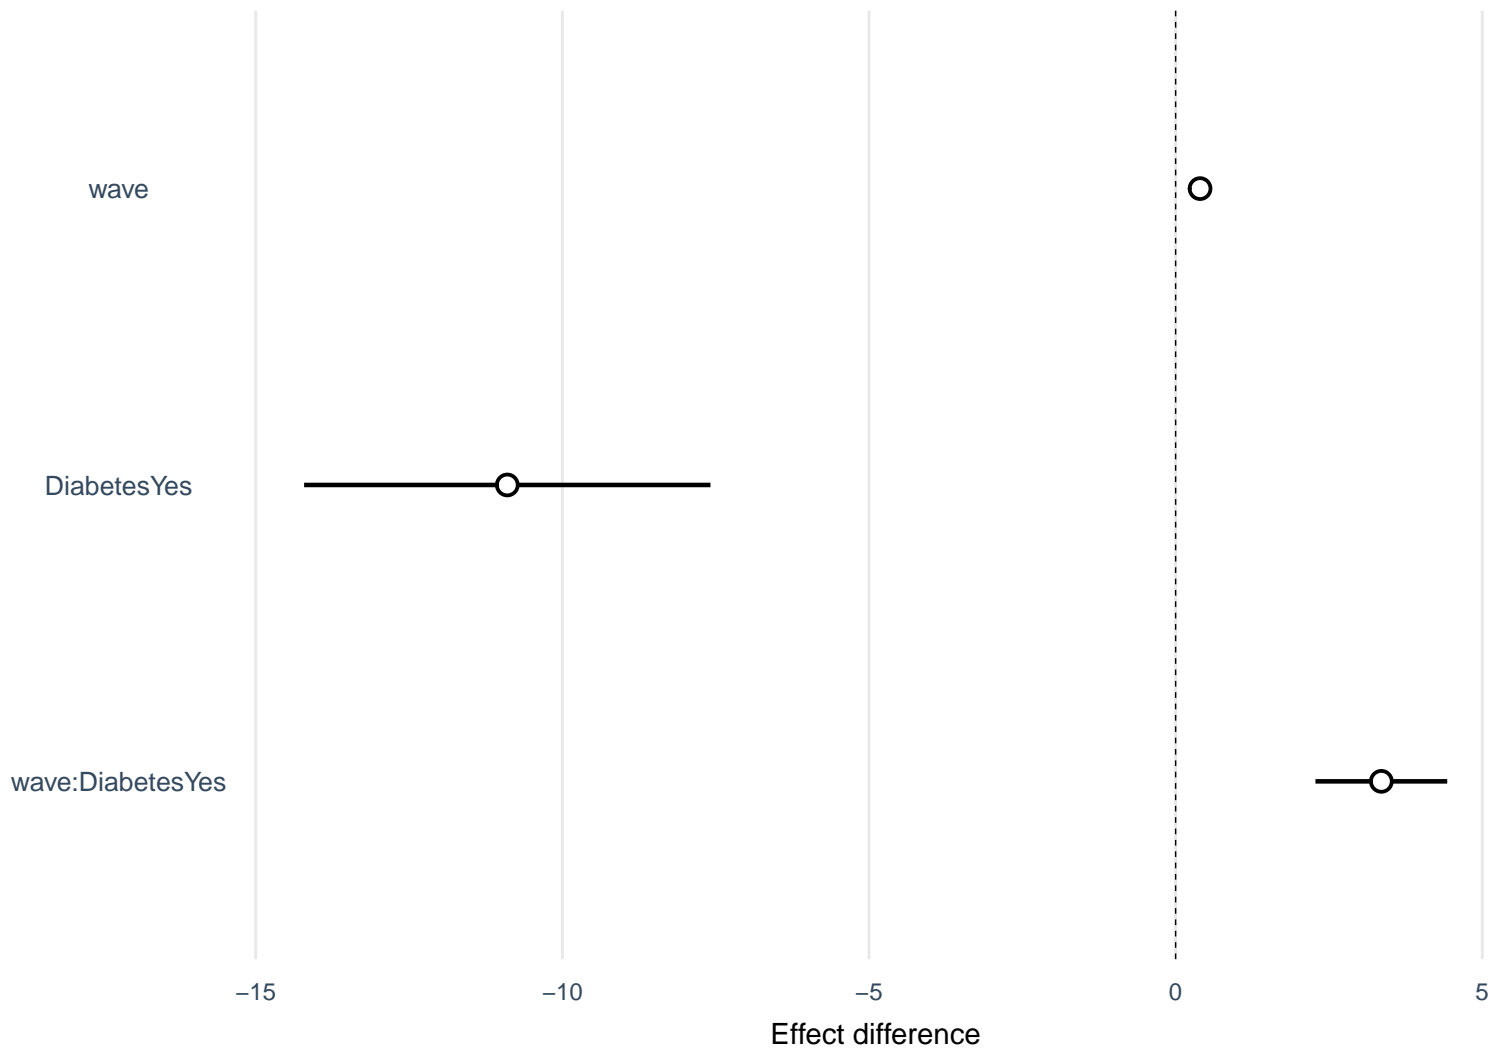

# Chronic\_lung\_disease

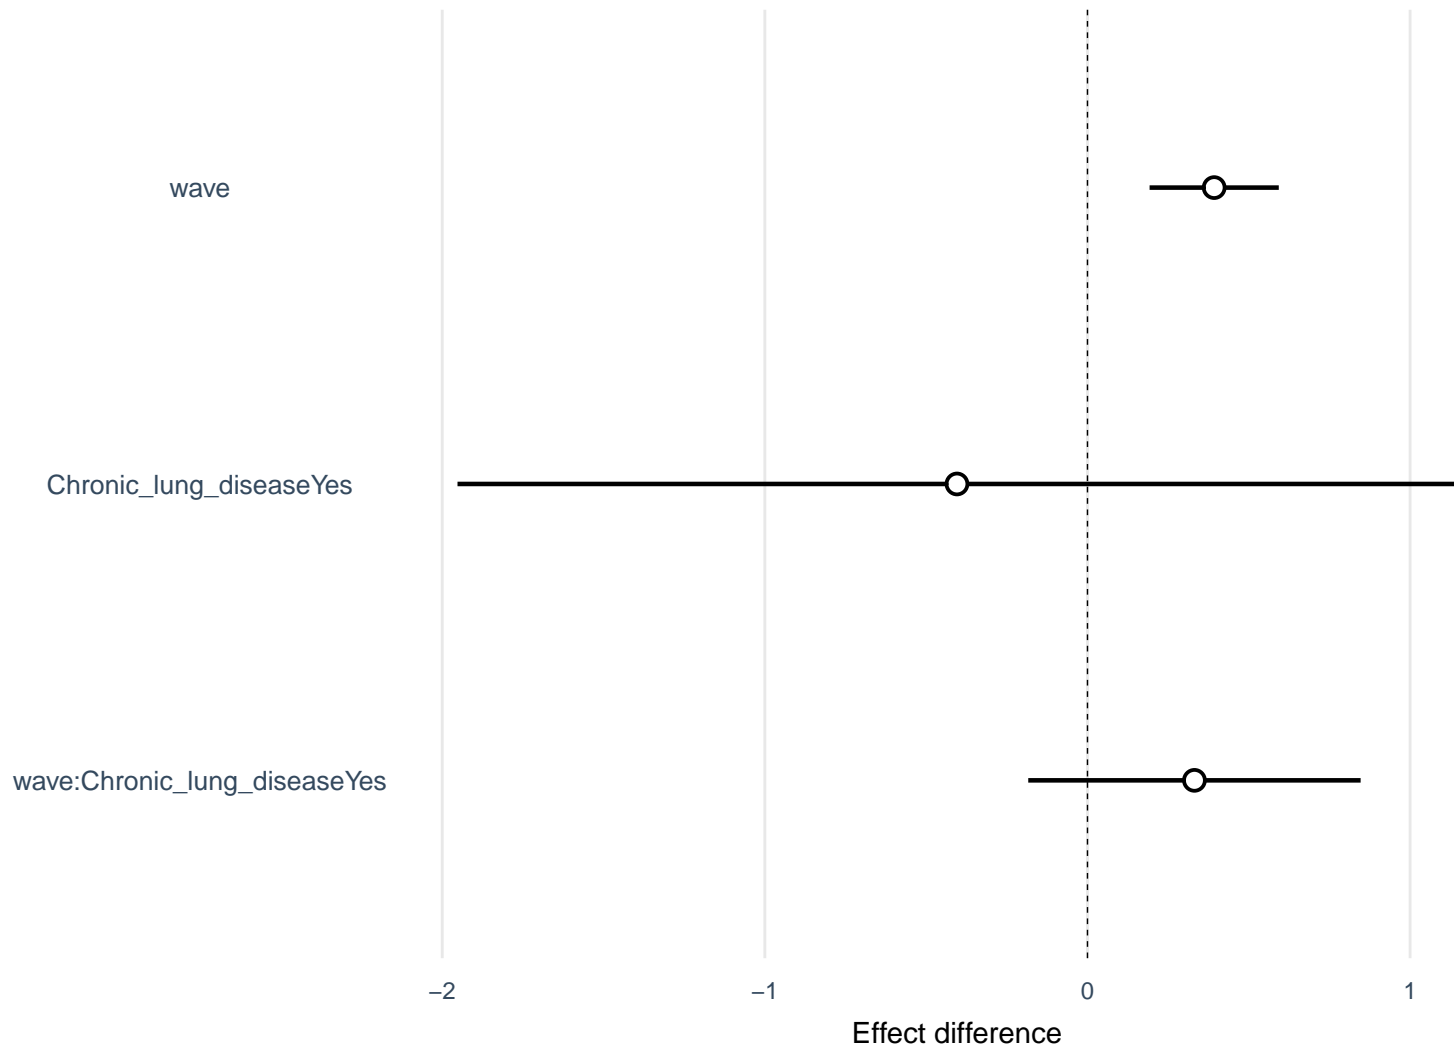



# Chronic\_heart\_disease

wave

Chronic\_heart\_diseaseYes

wave:Chronic\_heart\_diseaseYes

-6

-3

0

3

Effect difference

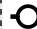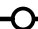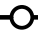

# Chronic\_psychiatric\_disorders

wave

Chronic\_psychiatric\_disordersYes

wave:Chronic\_psychiatric\_disordersYes

-10

-5

0

5

Effect difference

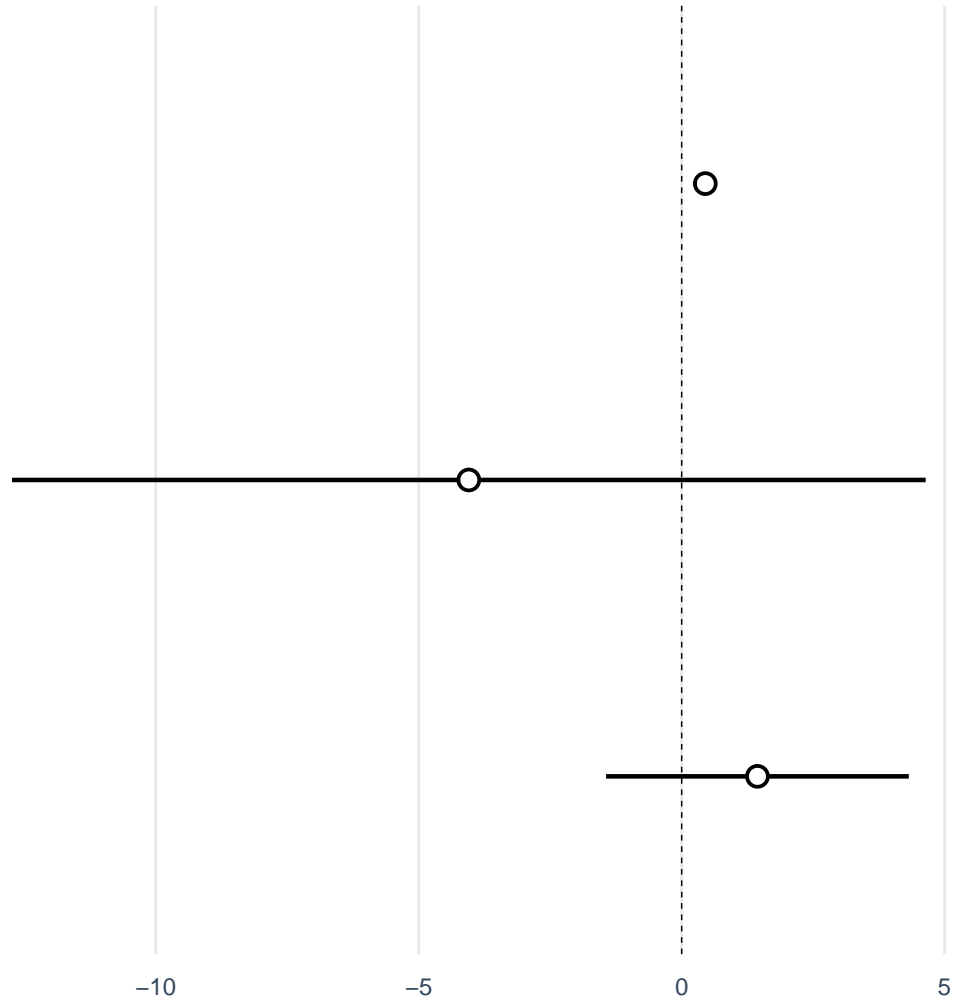

# Chronic\_liver\_disease

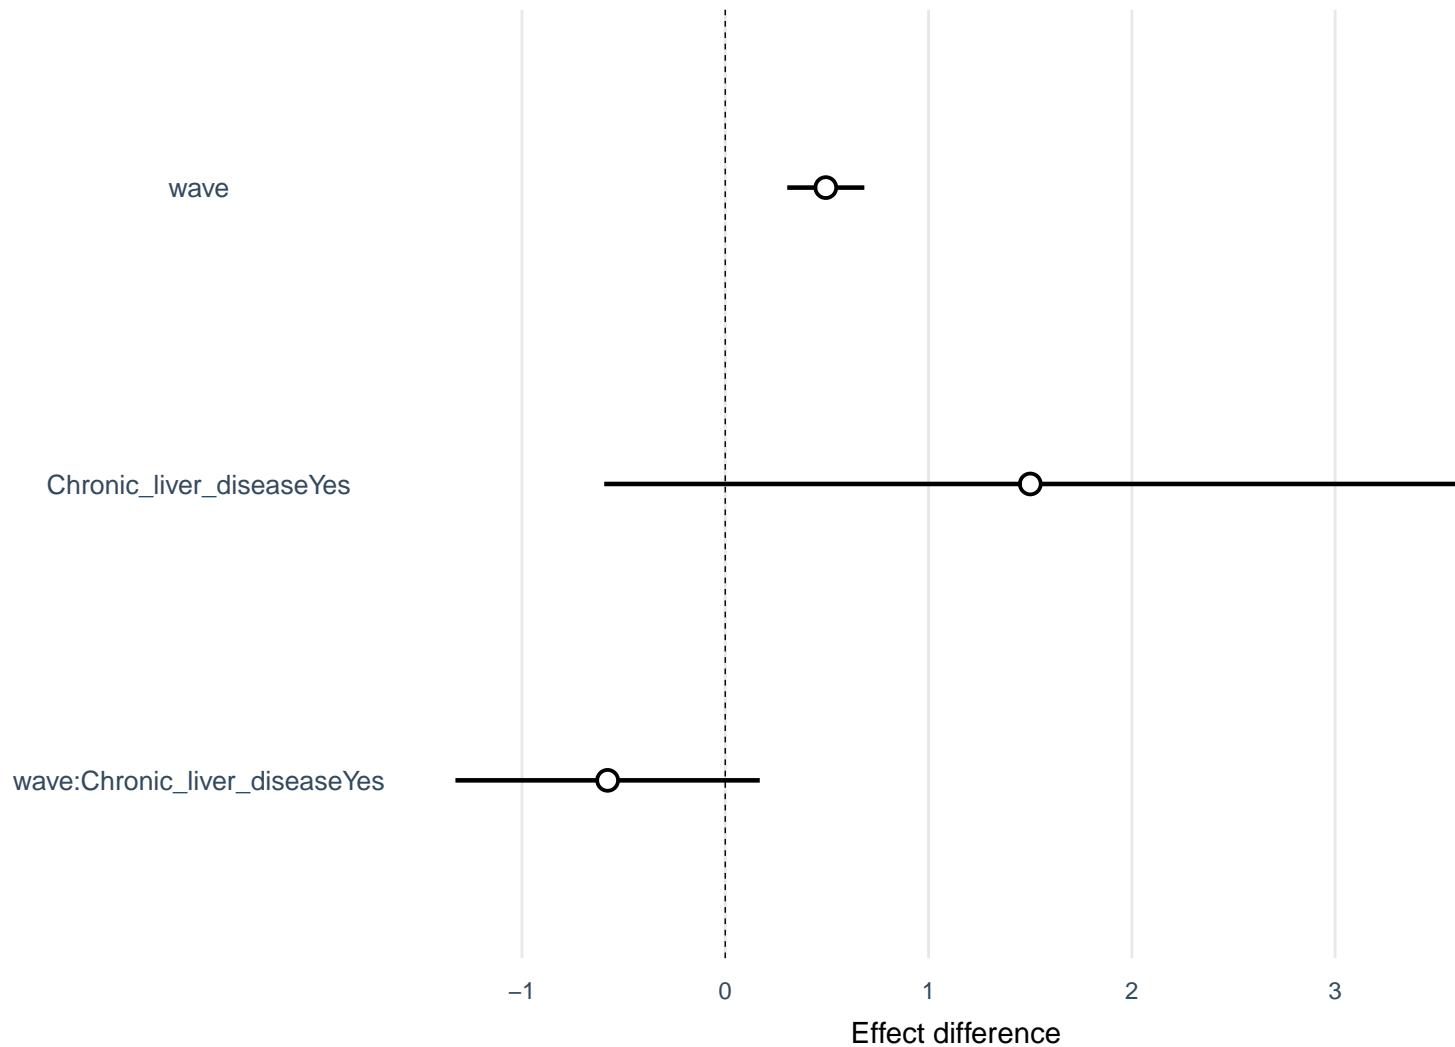

# Chronic\_kidney\_disease

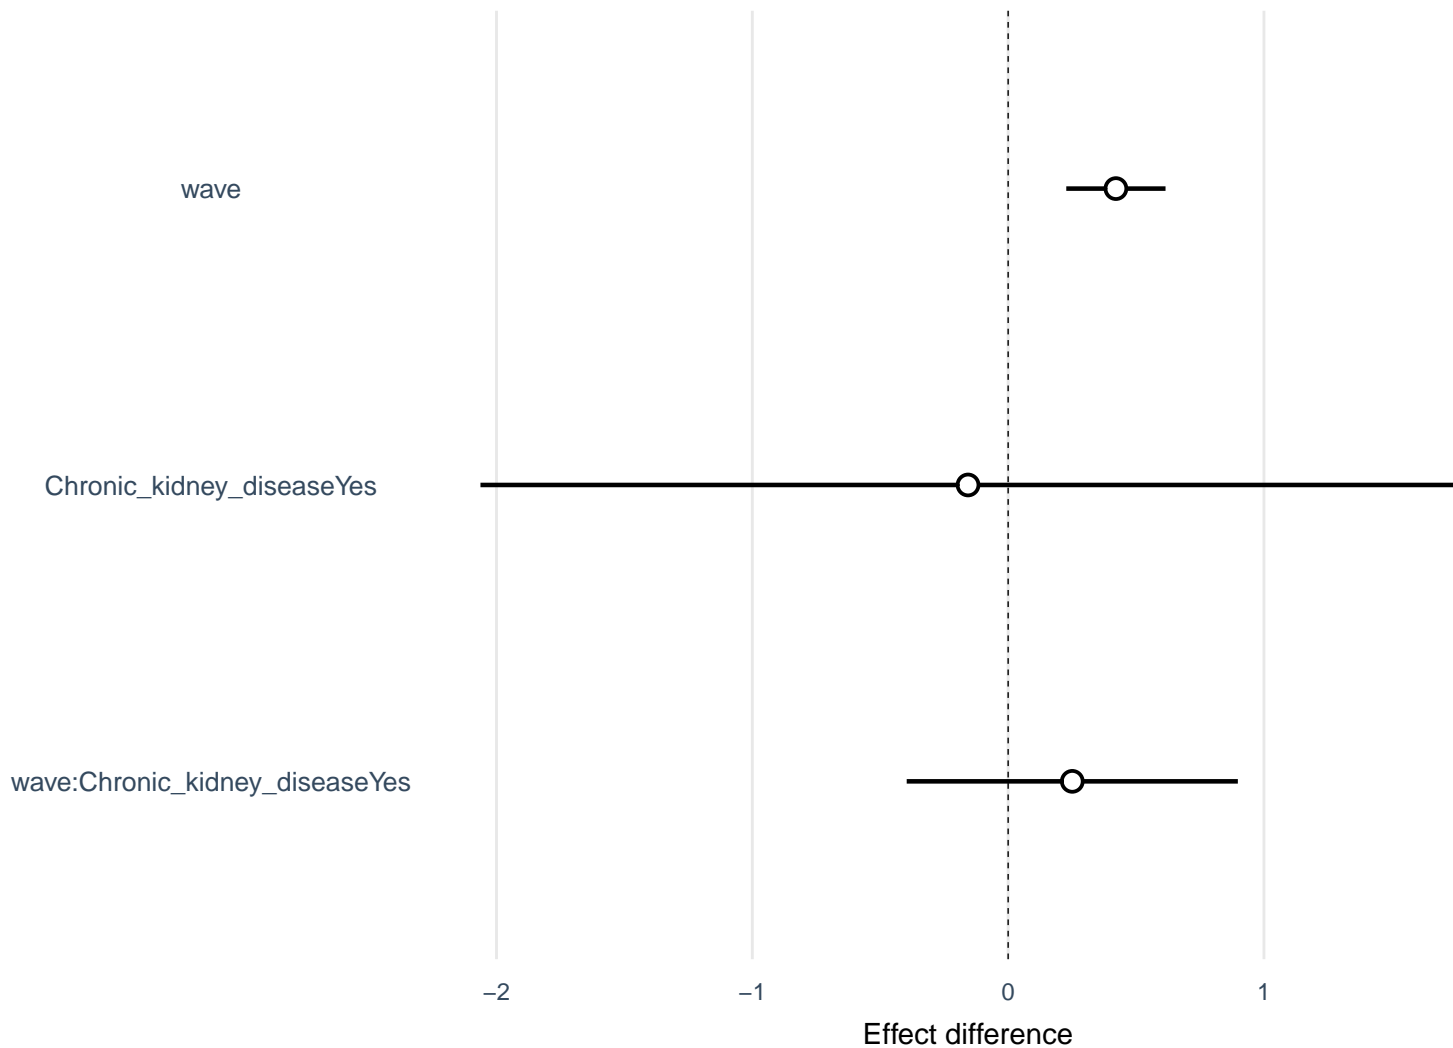

# Chronic\_digest\_disease

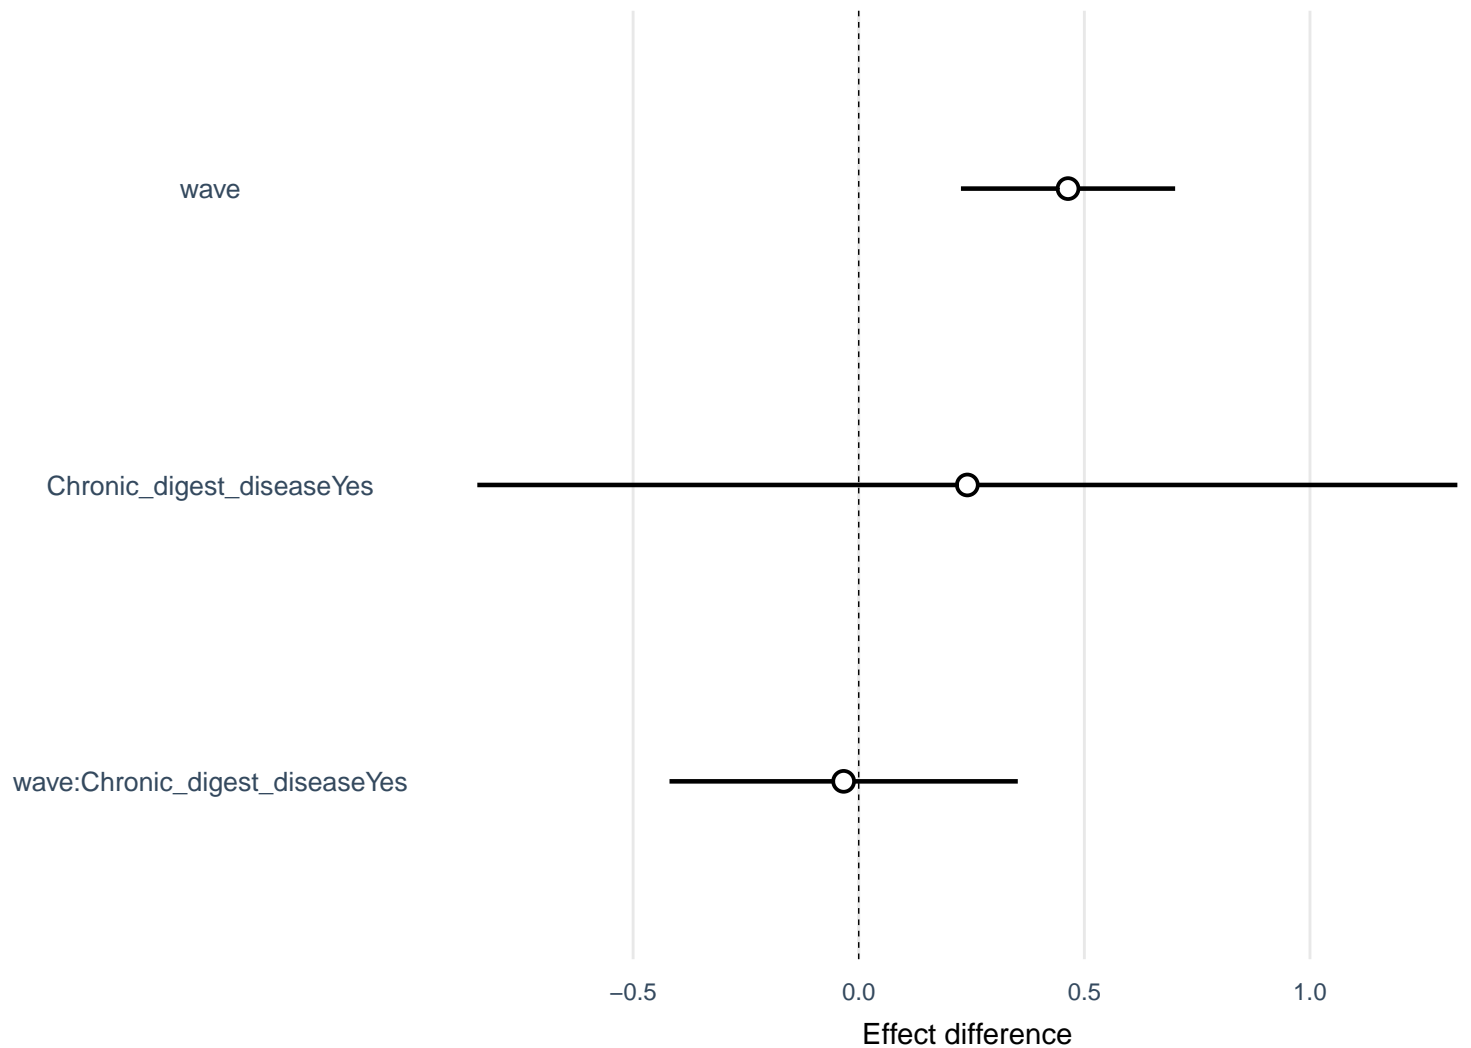

## Height\_Quartile

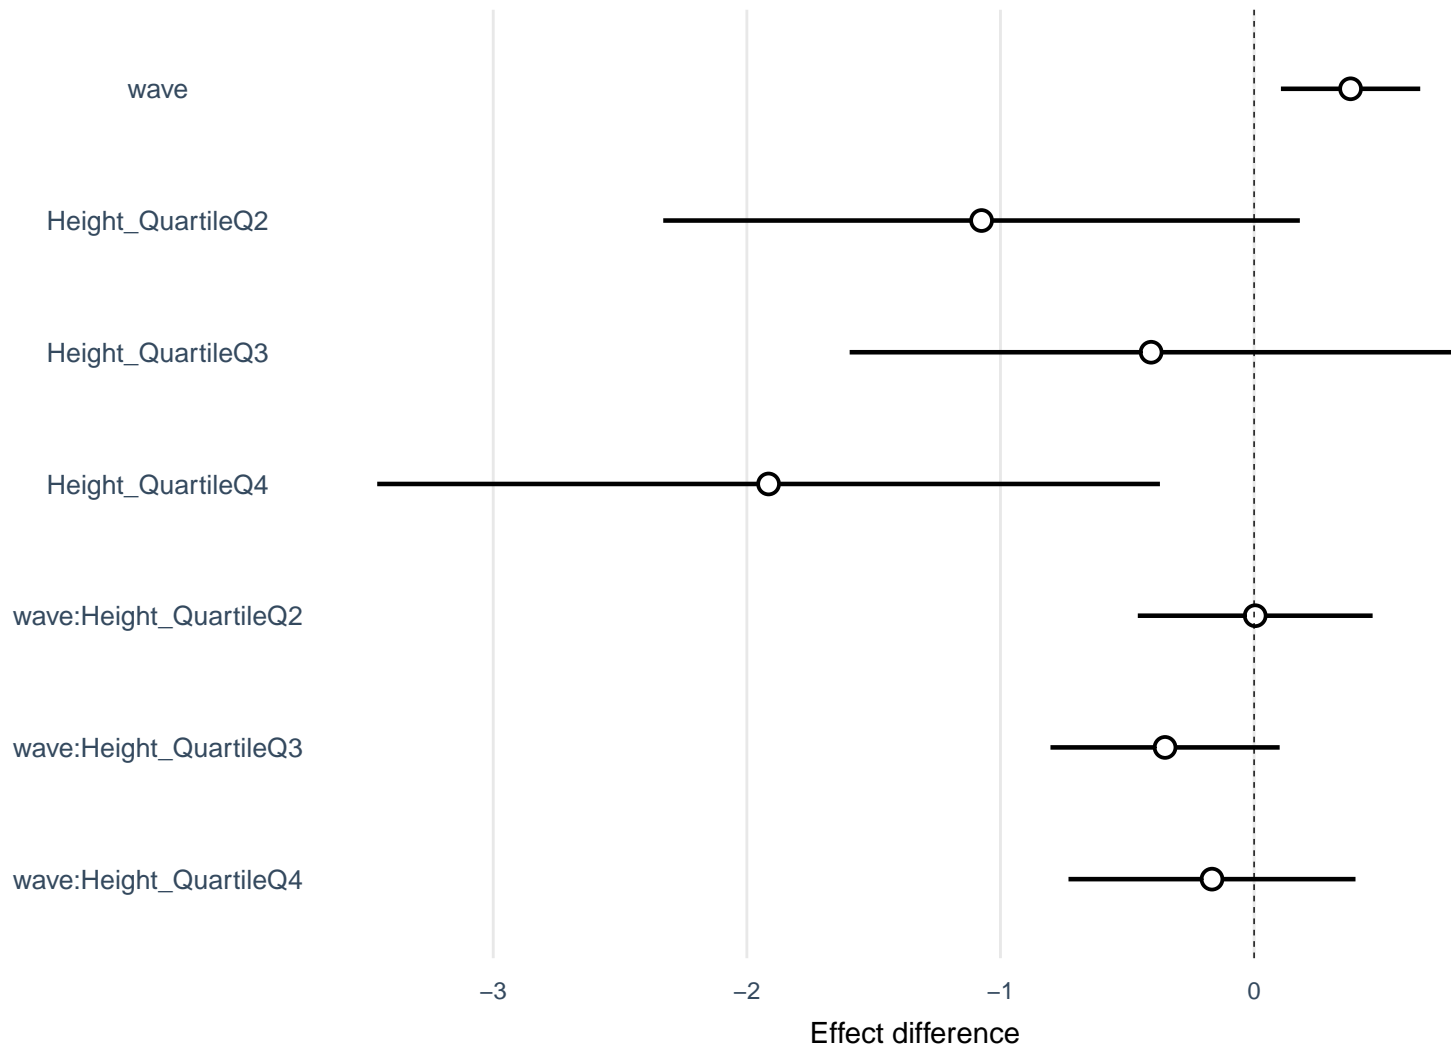

# Weight\_Quartile

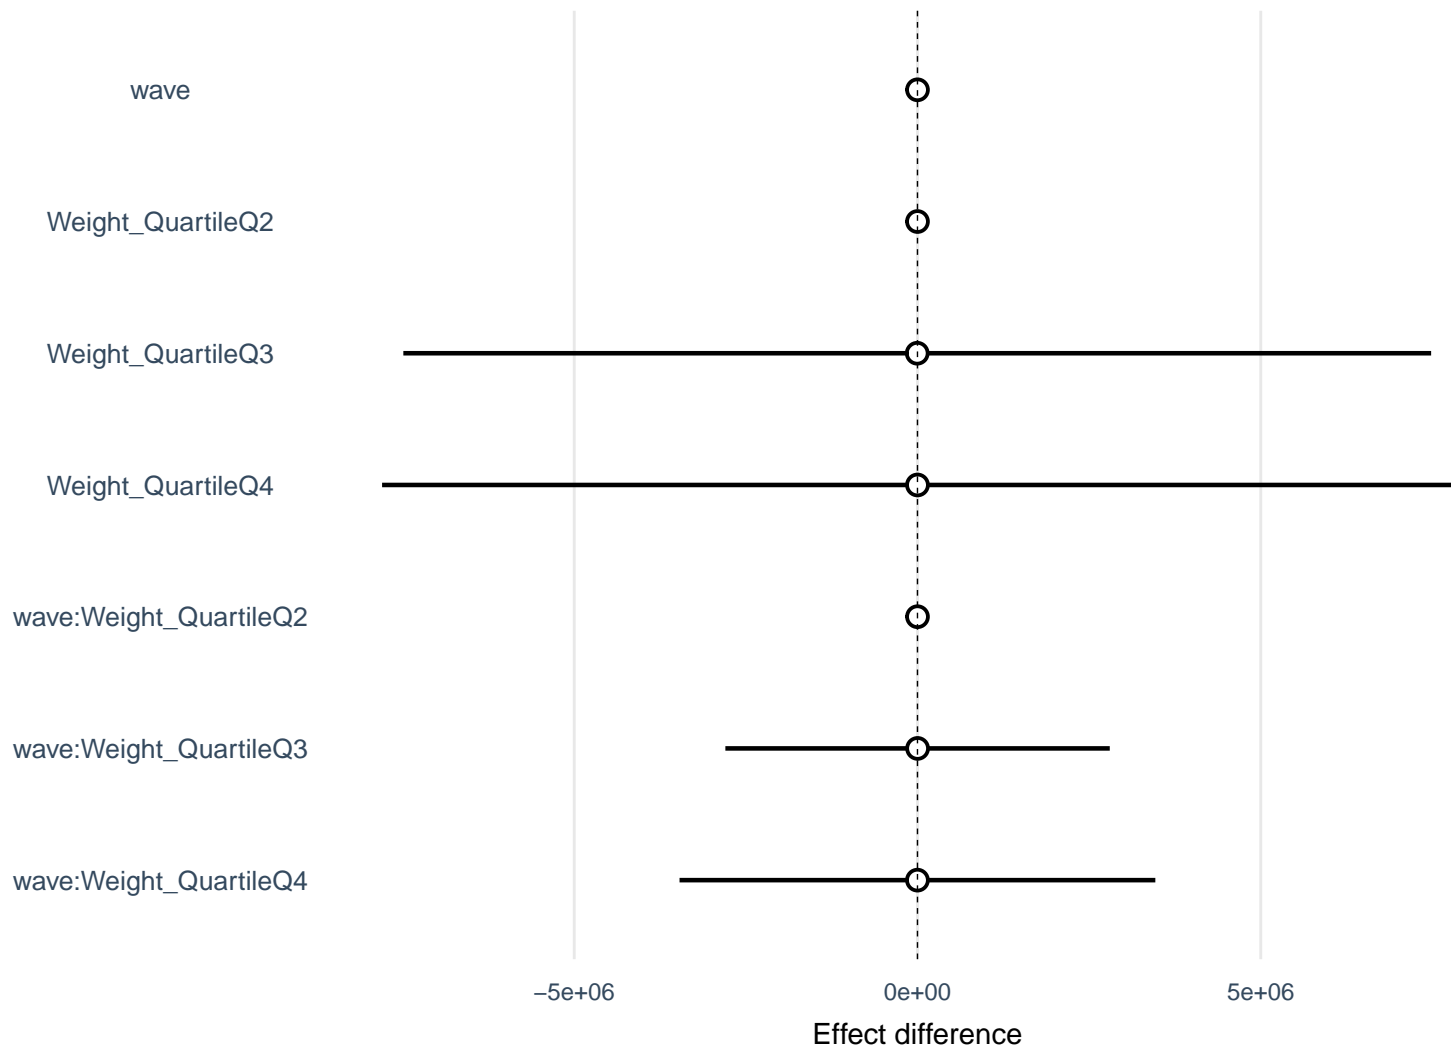

# BMI\_Quartile

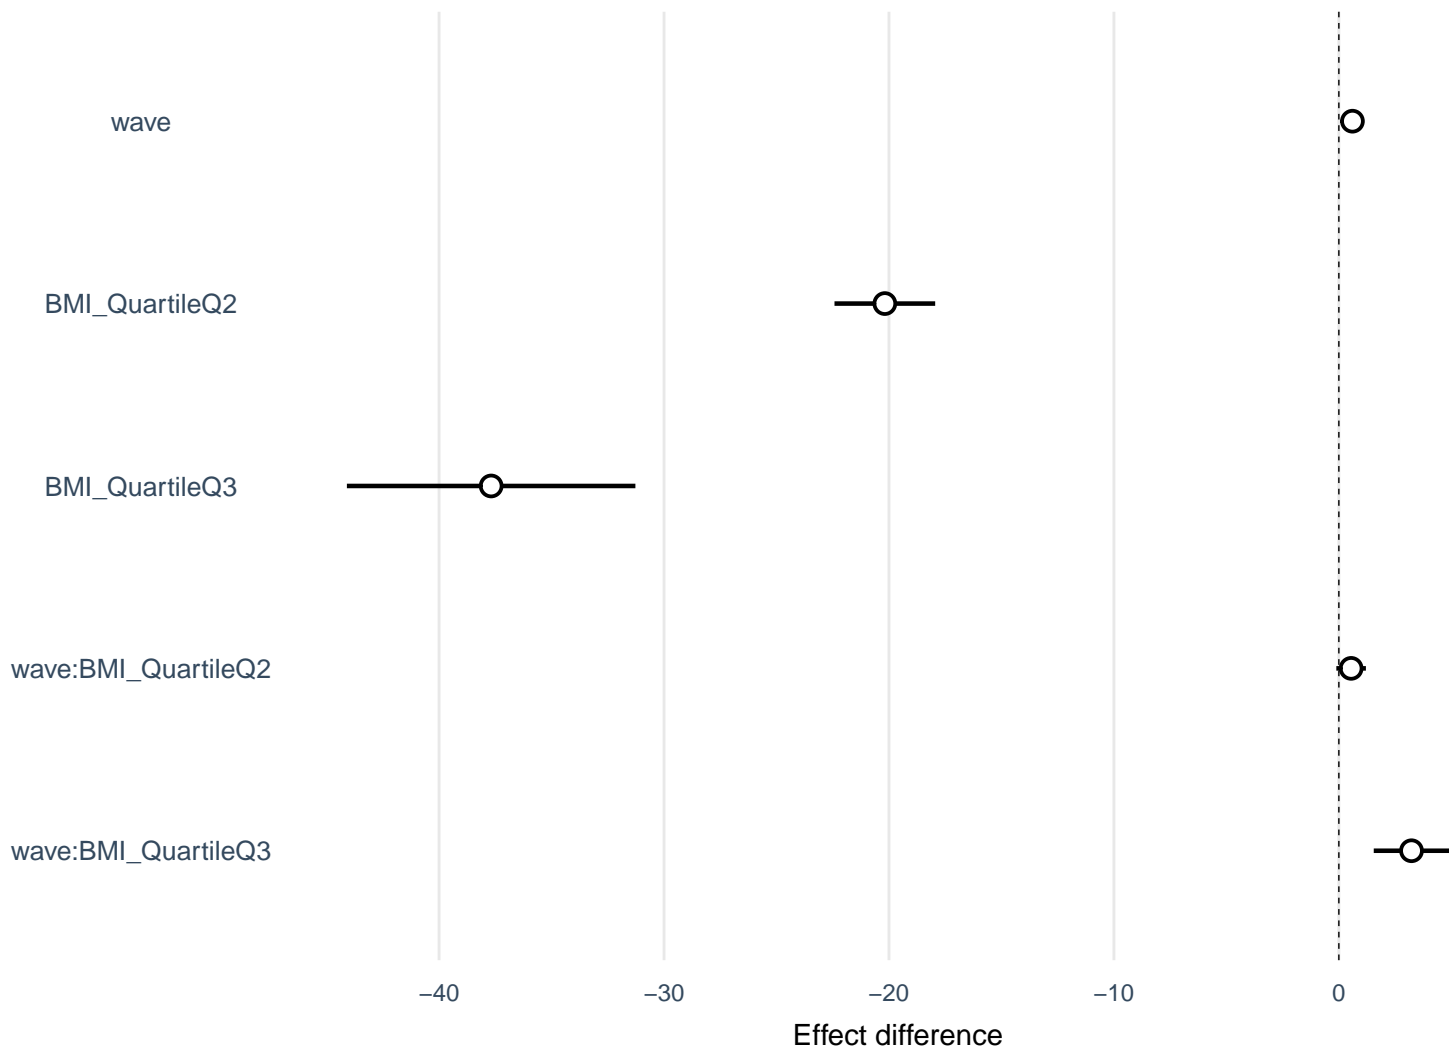



# PEF\_Quartile

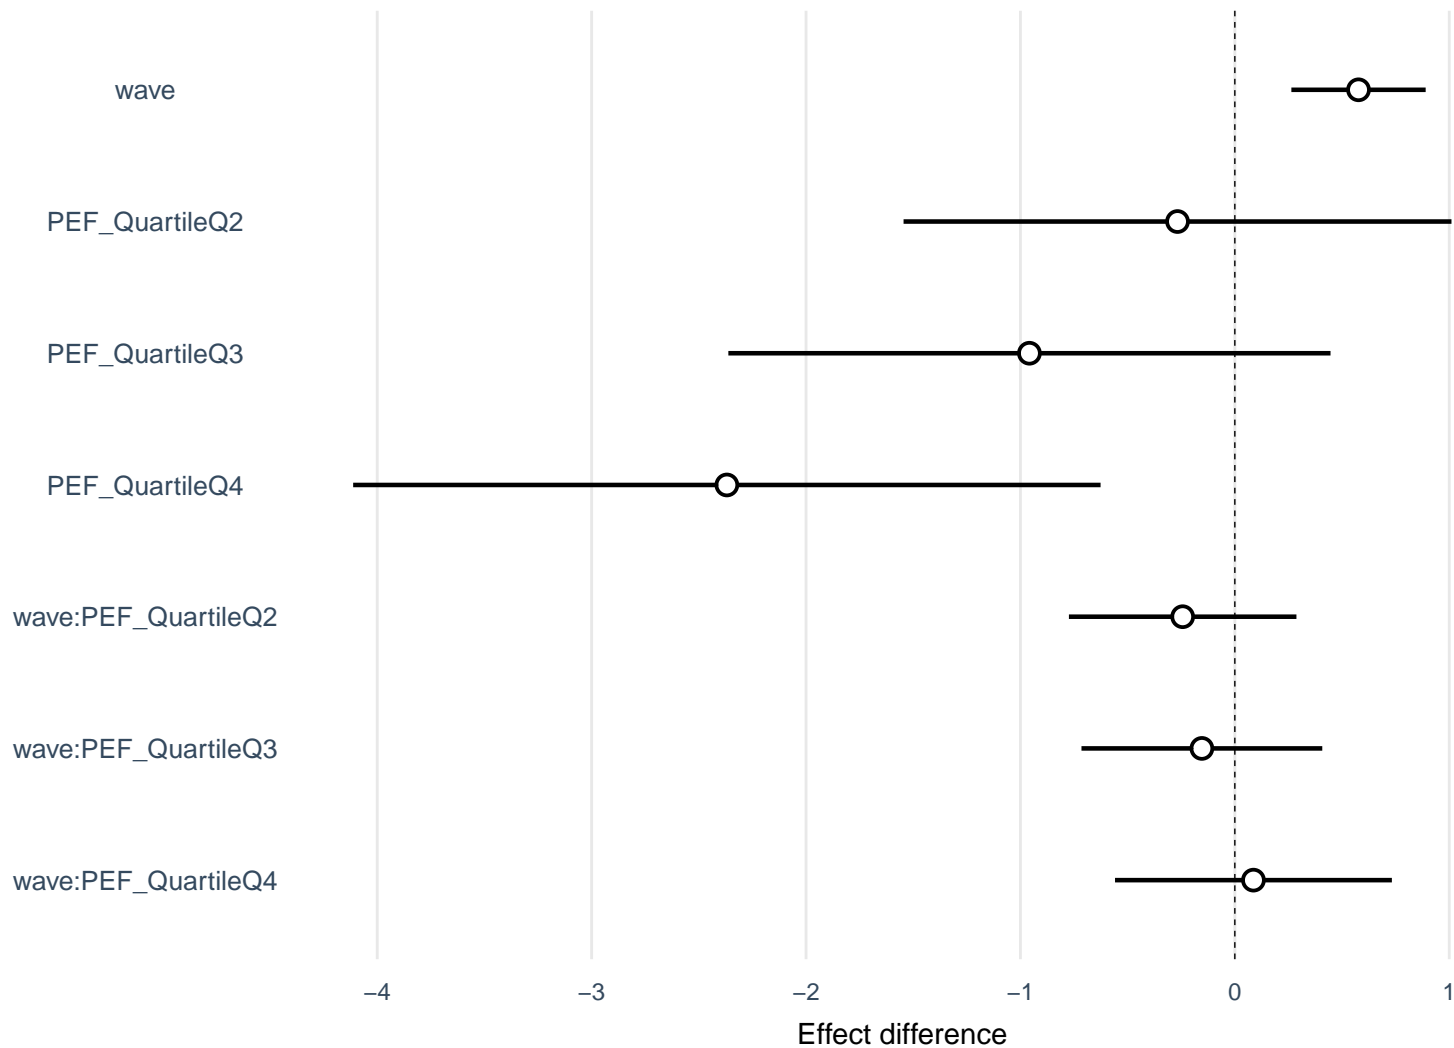

# Total\_cholesterol\_Quartile

wave

Total\_cholesterol\_QuartileQ2

Total\_cholesterol\_QuartileQ3

Total\_cholesterol\_QuartileQ4

wave:Total\_cholesterol\_QuartileQ2

wave:Total\_cholesterol\_QuartileQ3

wave:Total\_cholesterol\_QuartileQ4

-7.5

-5.0

-2.5

0.0

2.5

Effect difference

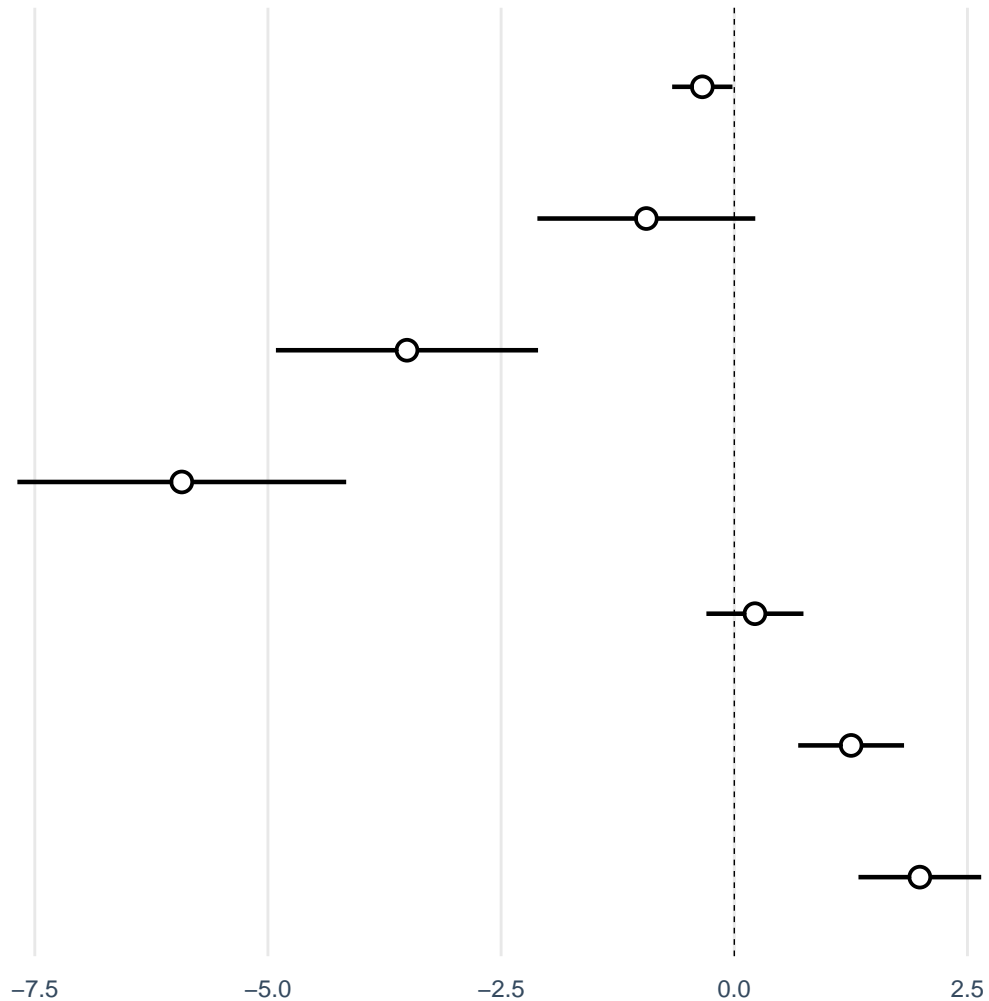

# Triglycerides\_Quartile

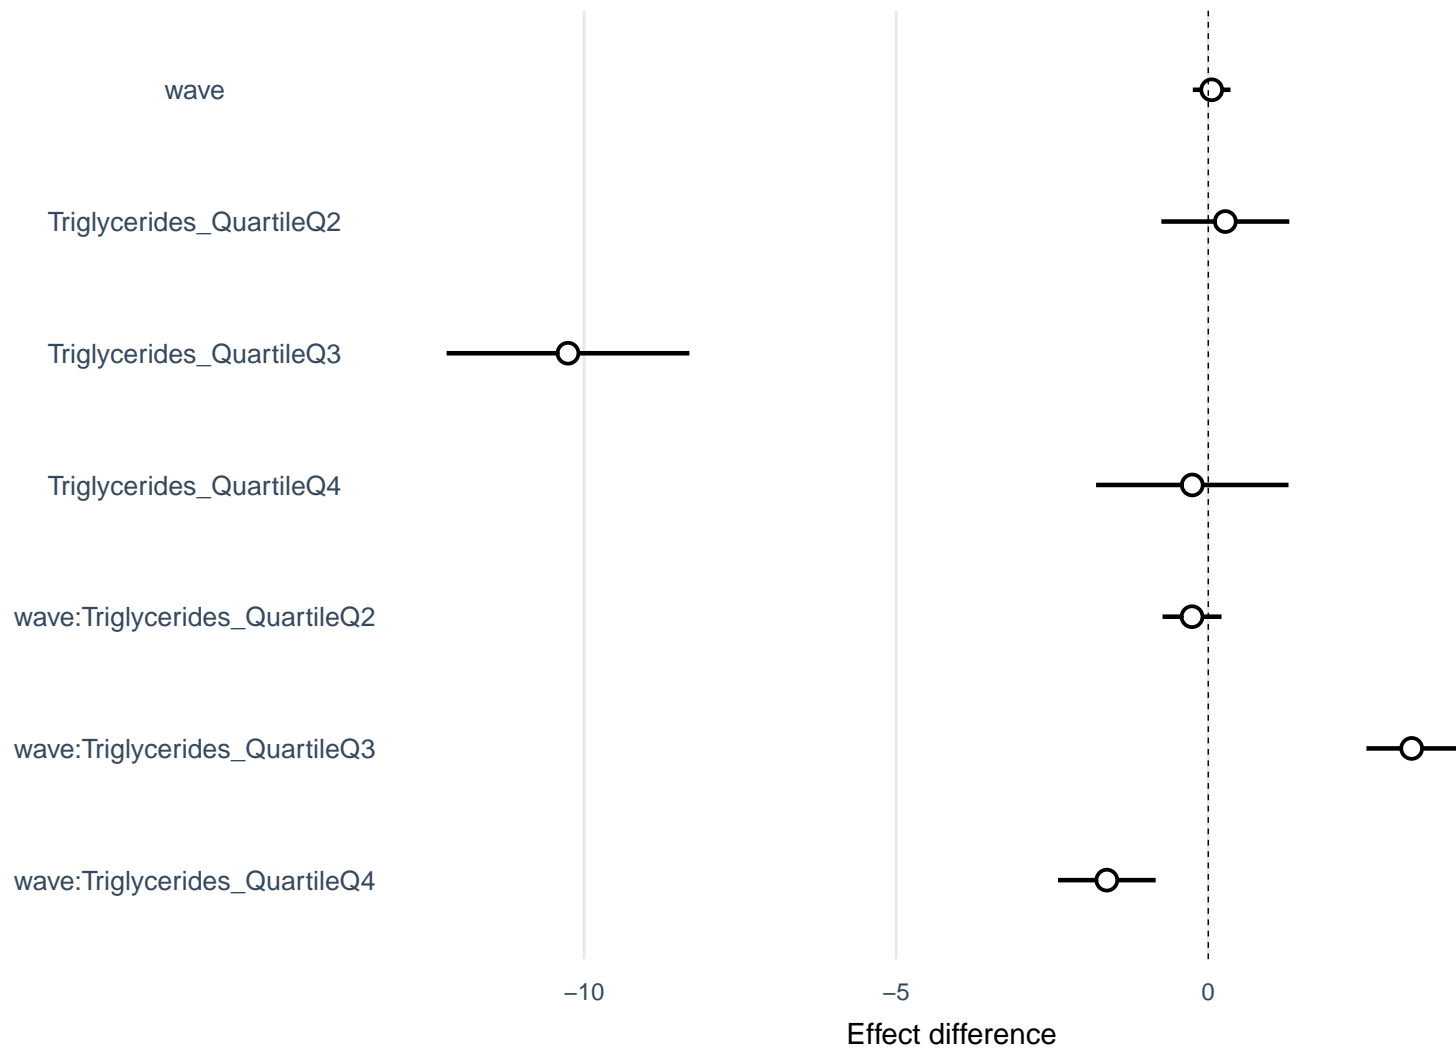

# TyG\_Quartile

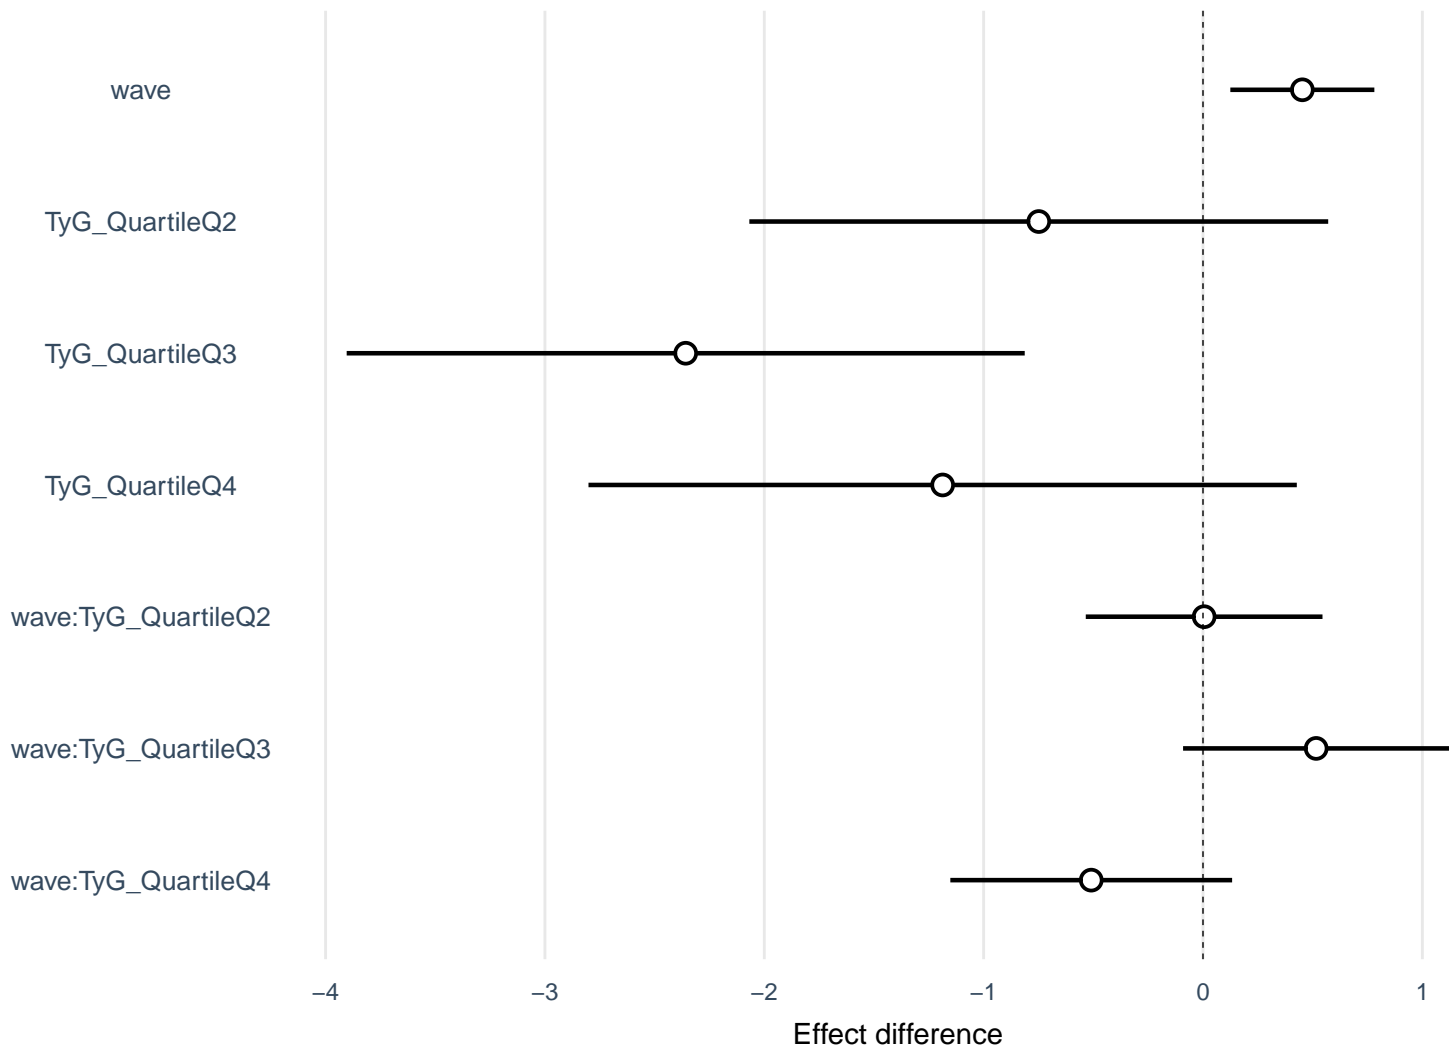

# Uric\_Acid\_Quartile

wave

Uric\_Acid\_QuartileQ2

Uric\_Acid\_QuartileQ3

Uric\_Acid\_QuartileQ4

wave:Uric\_Acid\_QuartileQ2

wave:Uric\_Acid\_QuartileQ3

wave:Uric\_Acid\_QuartileQ4

-5.0

-2.5

0.0

2.5

Effect difference

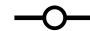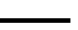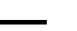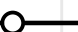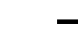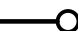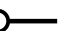

BUN\_Quartile

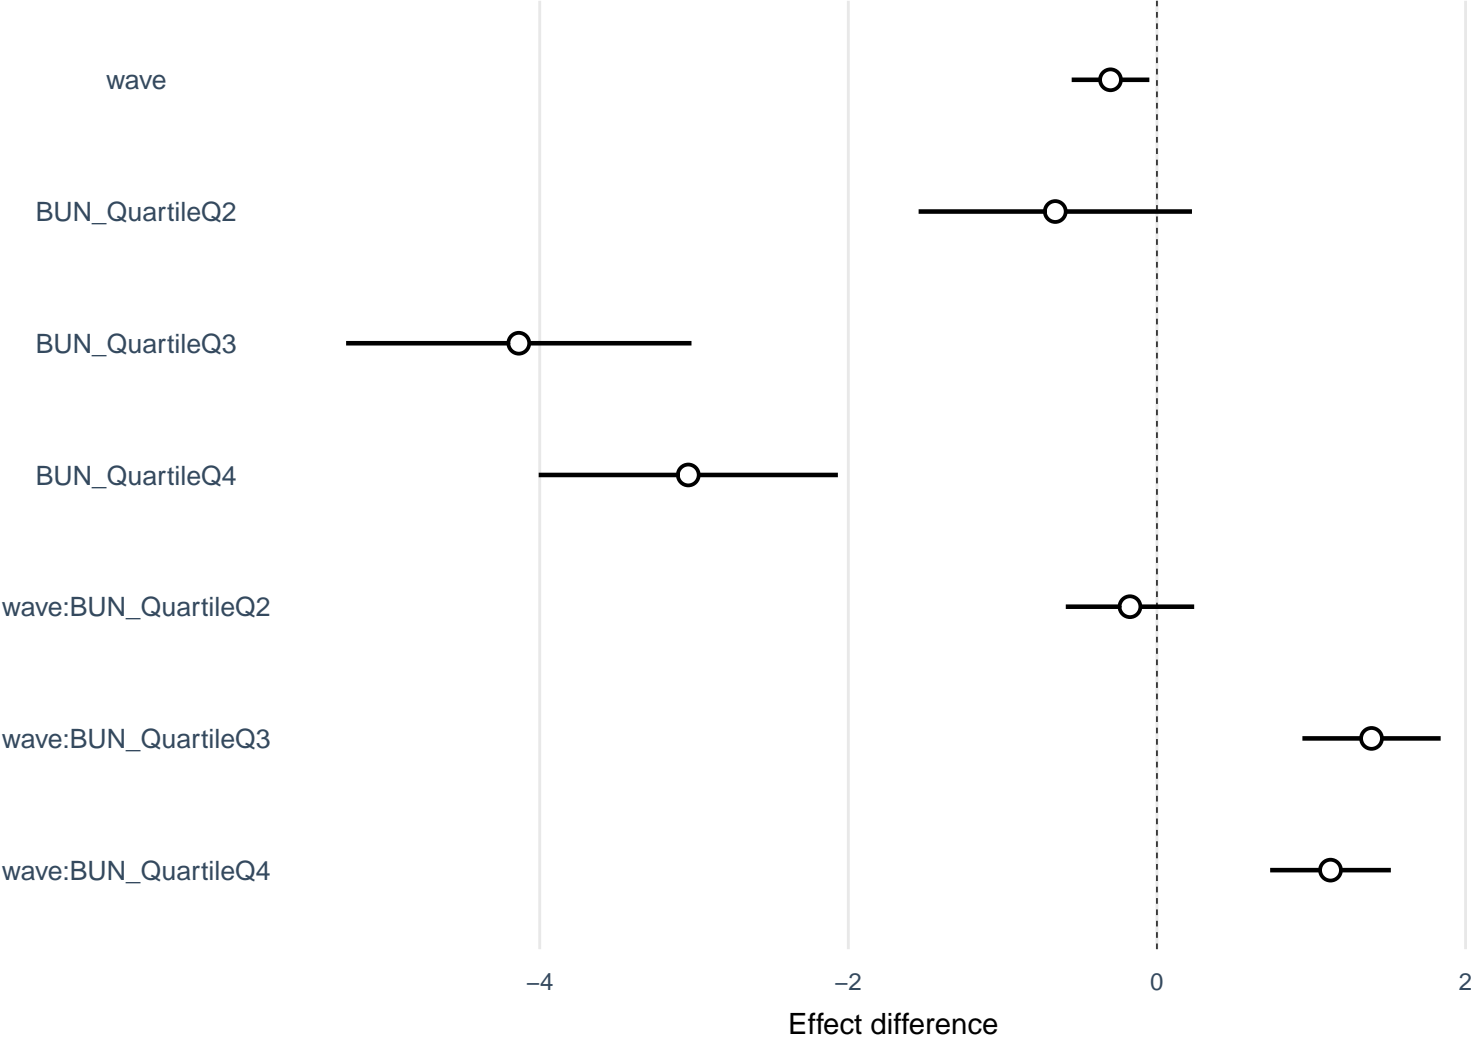

# Cystatin\_C\_Quartile

wave

Cystatin\_C\_QuartileQ2

Cystatin\_C\_QuartileQ3

Cystatin\_C\_QuartileQ4

wave:Cystatin\_C\_QuartileQ2

wave:Cystatin\_C\_QuartileQ3

wave:Cystatin\_C\_QuartileQ4

-2

0

2

4

Effect difference

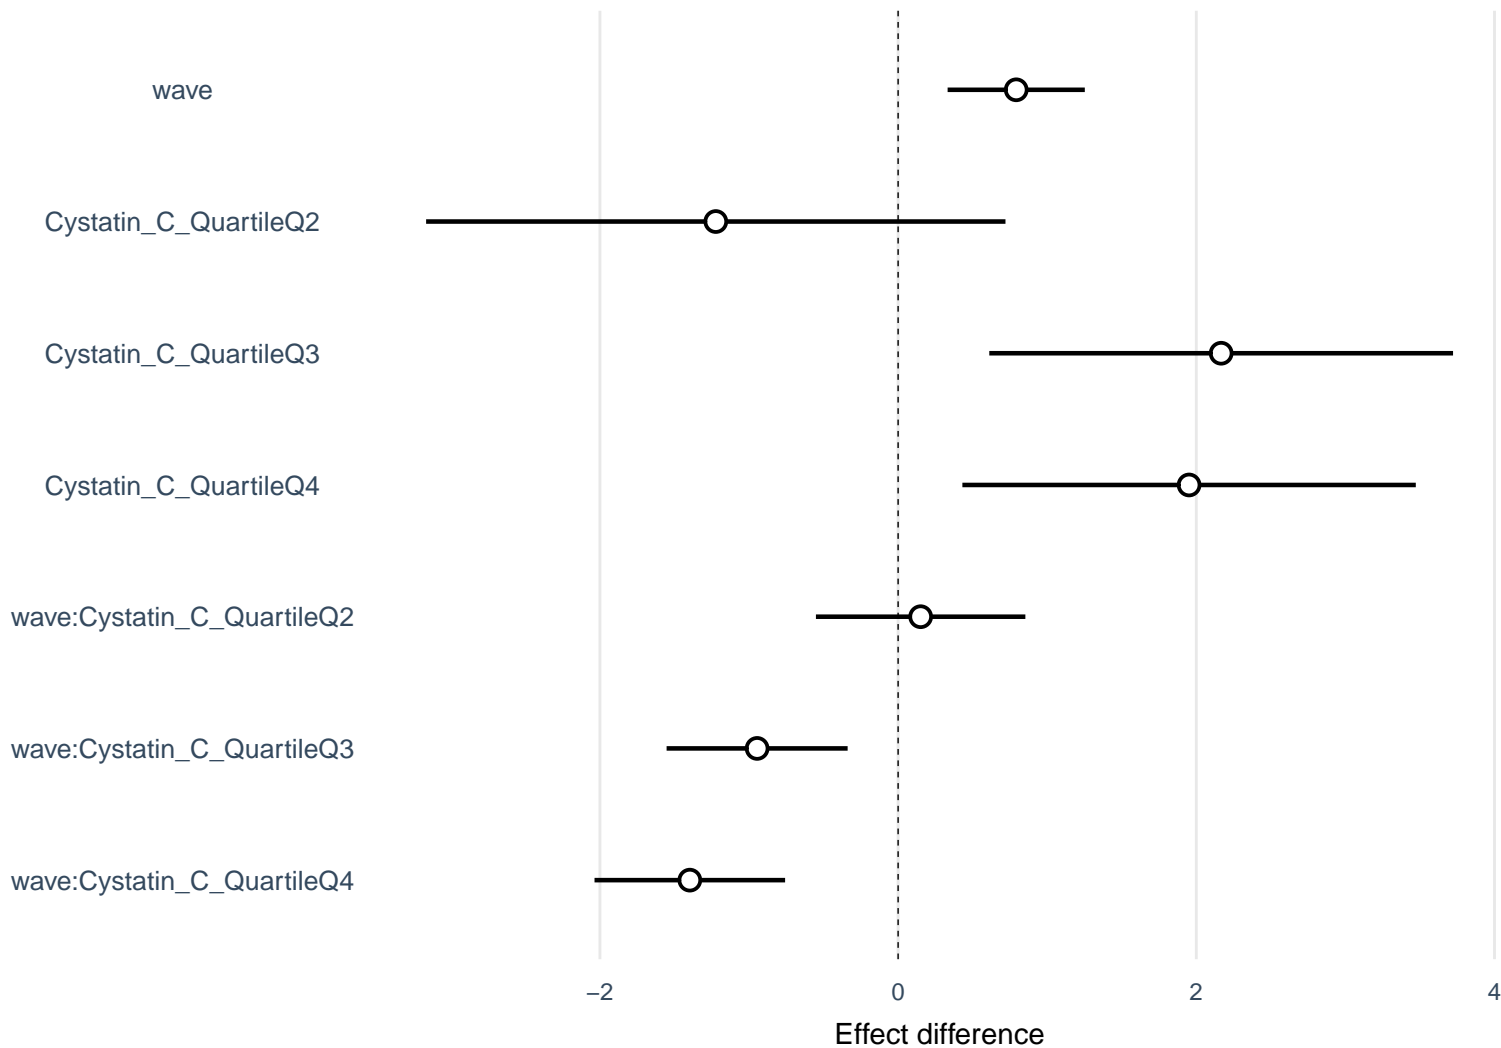

# CRP\_Quartile

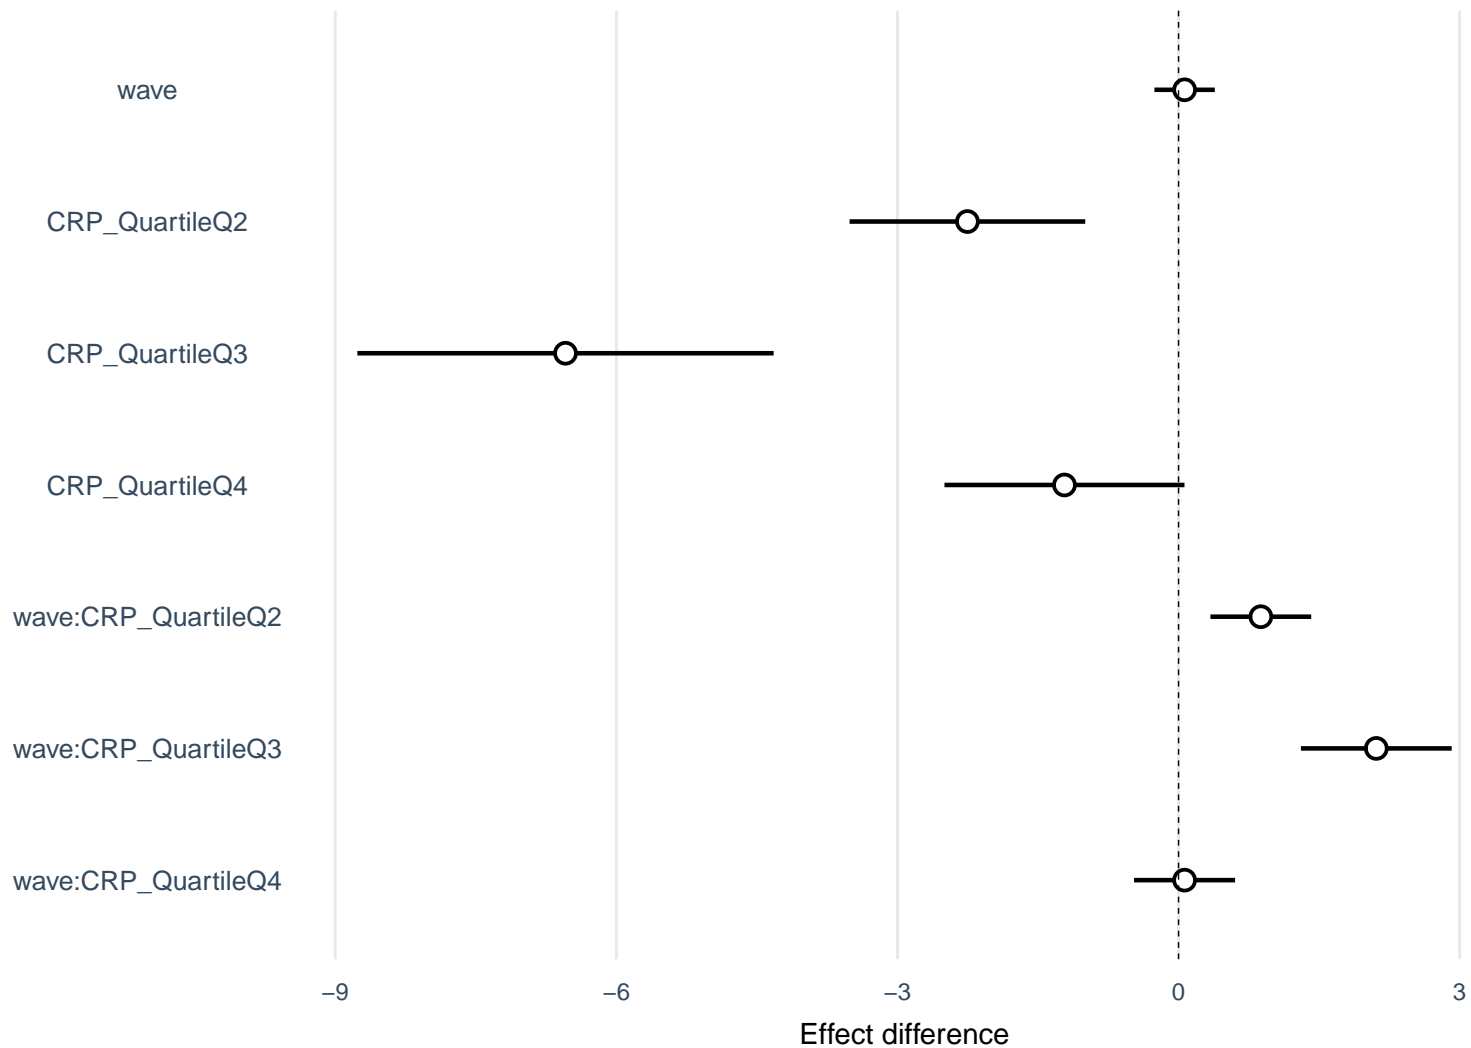



# Glycated\_Hemoglobin\_Quartile

wave

Glycated\_Hemoglobin\_QuartileQ2

Glycated\_Hemoglobin\_QuartileQ3

Glycated\_Hemoglobin\_QuartileQ4

wave:Glycated\_Hemoglobin\_QuartileQ2

wave:Glycated\_Hemoglobin\_QuartileQ3

wave:Glycated\_Hemoglobin\_QuartileQ4

-30

-20

-10

0

10

Effect difference

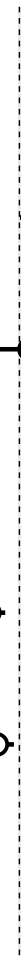

# HDL\_C\_Quartile

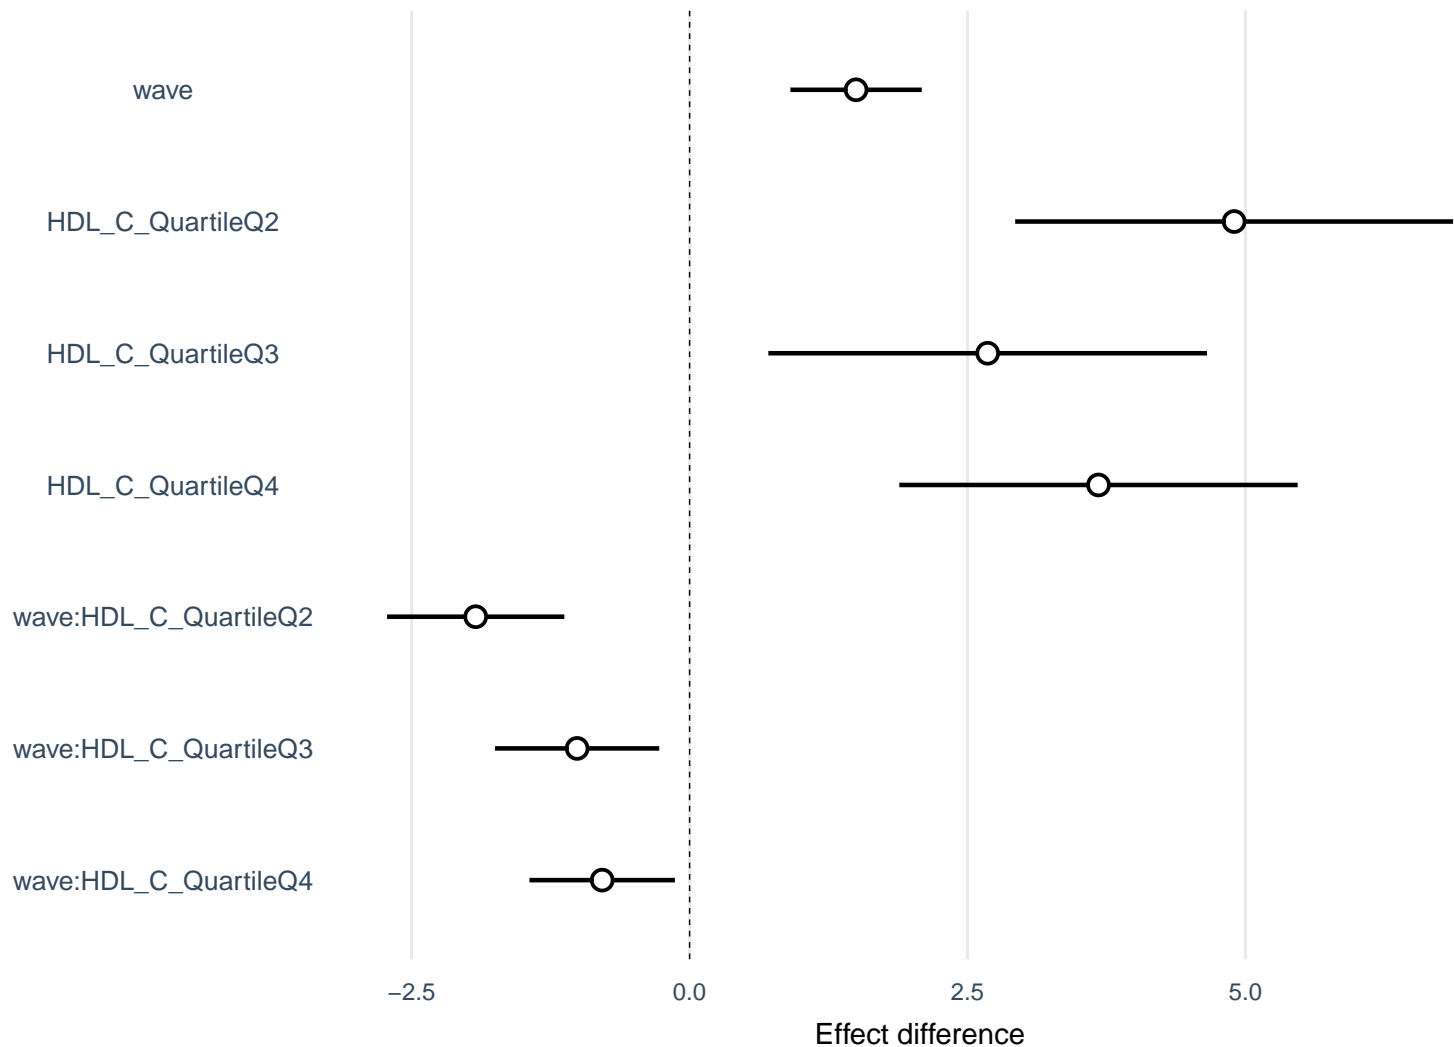

# LDL\_C\_Quartile

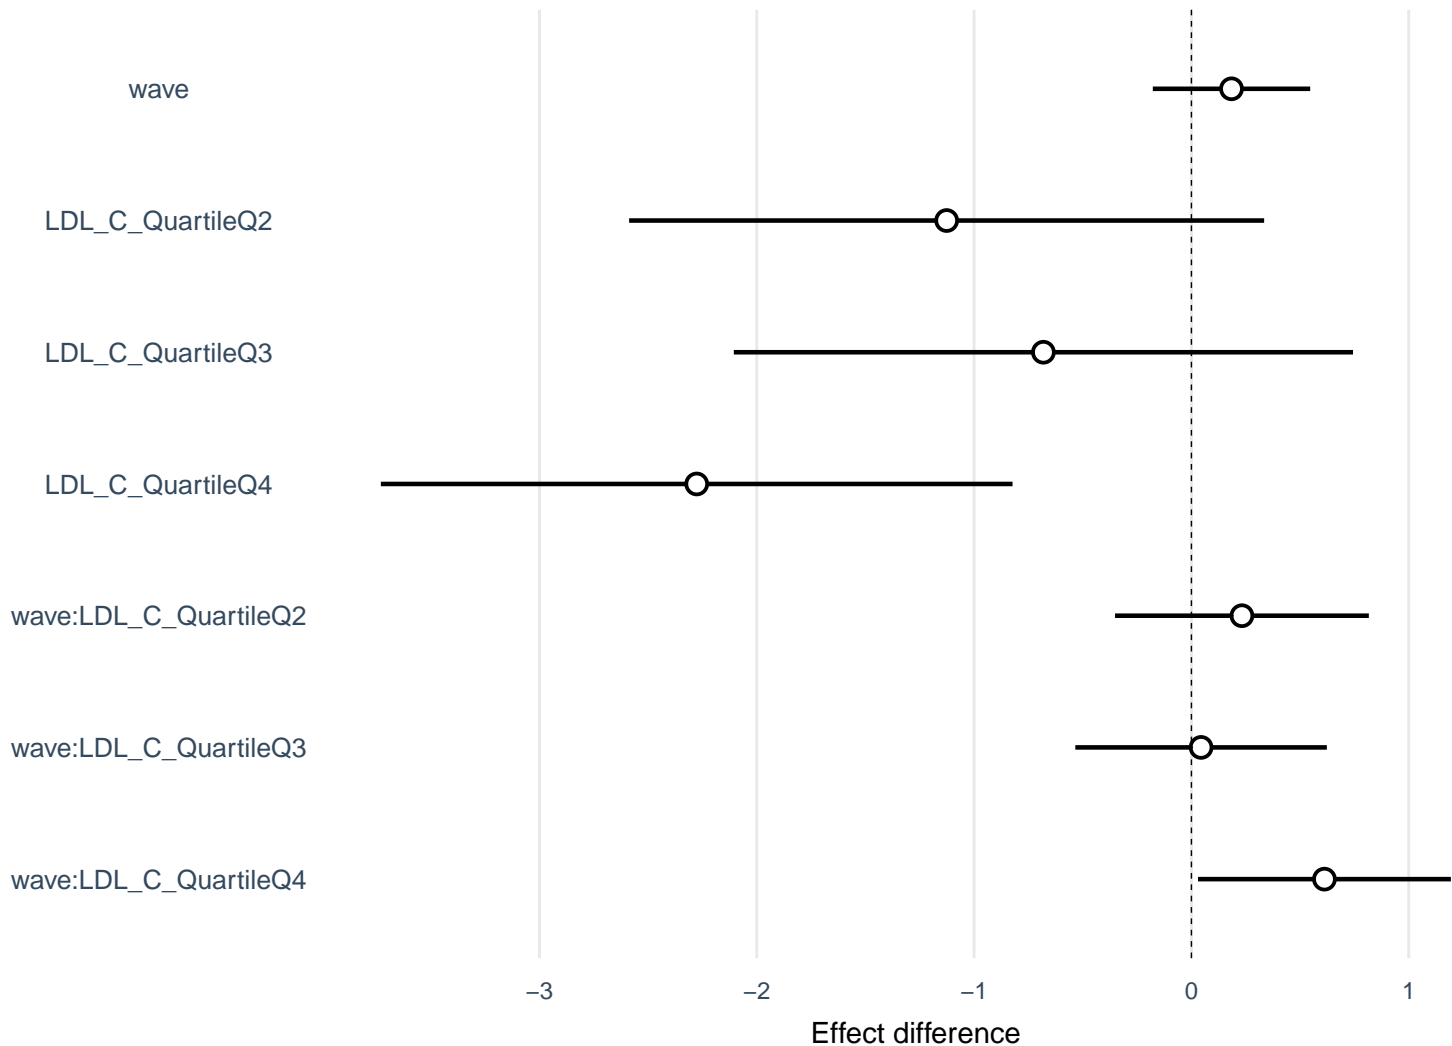

Age\_Quartile

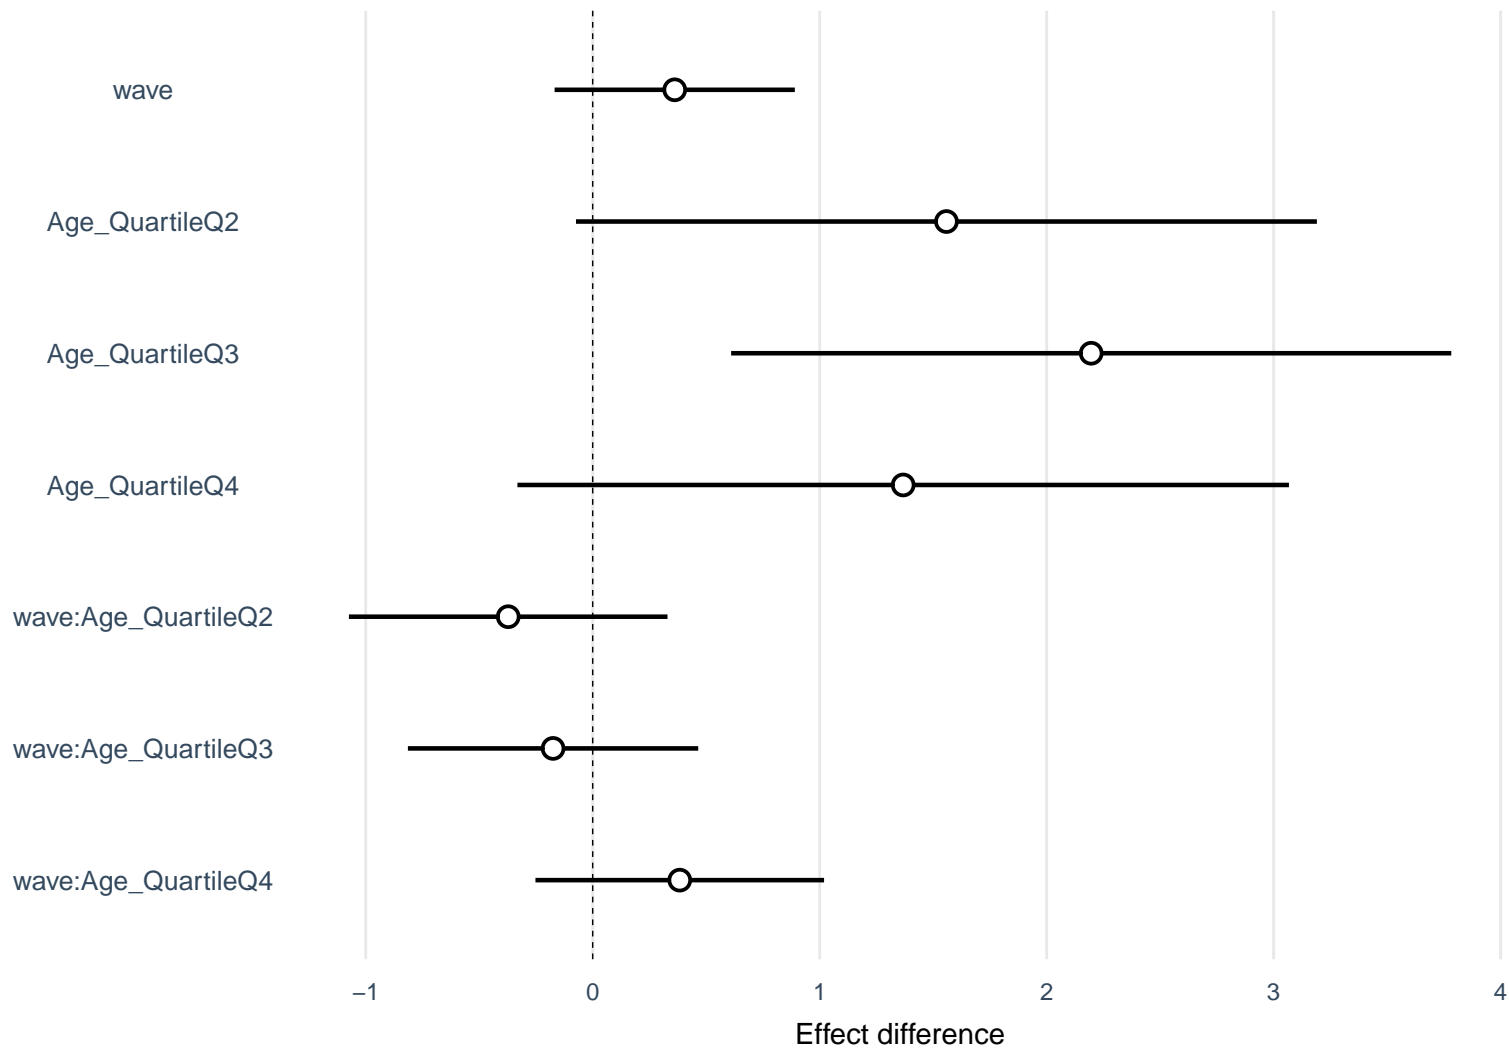

**Figure S2:** Learning curves of machine learning algorithms.

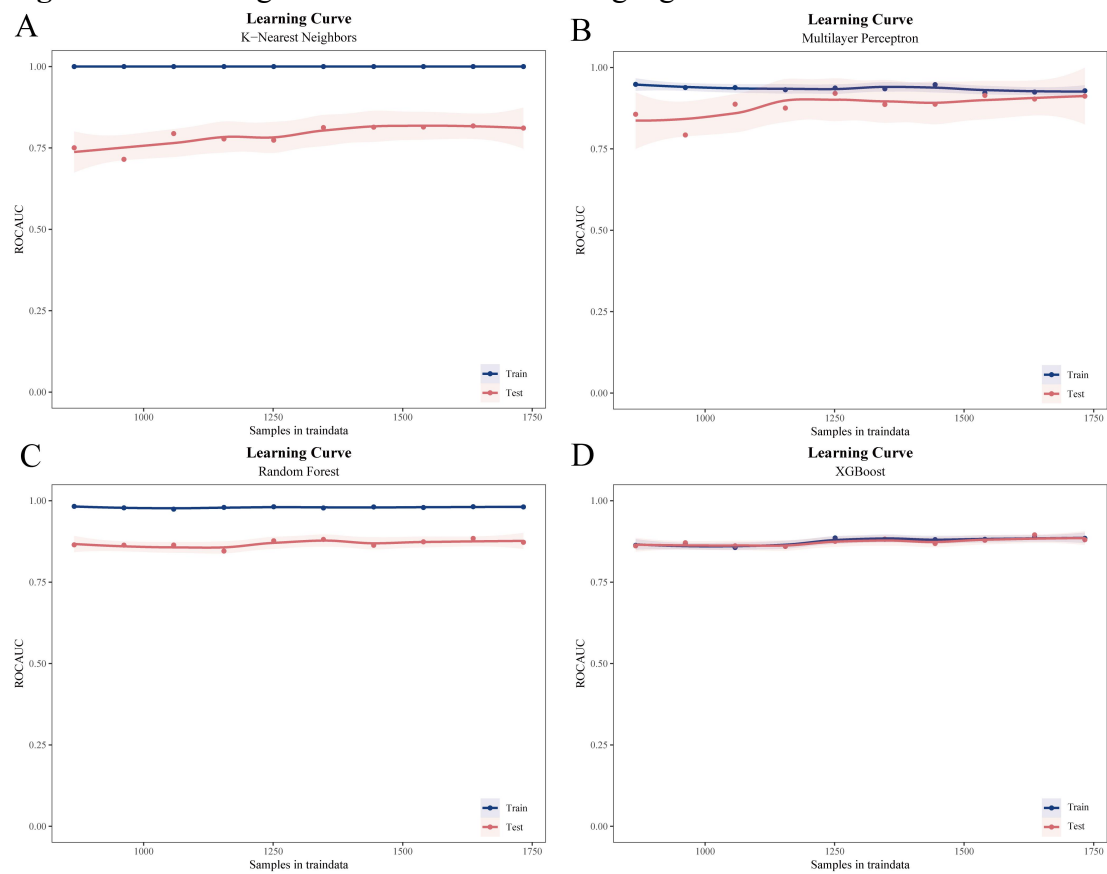

**Figure S3:** Calibration plots of machine learning algorithms in the training set.

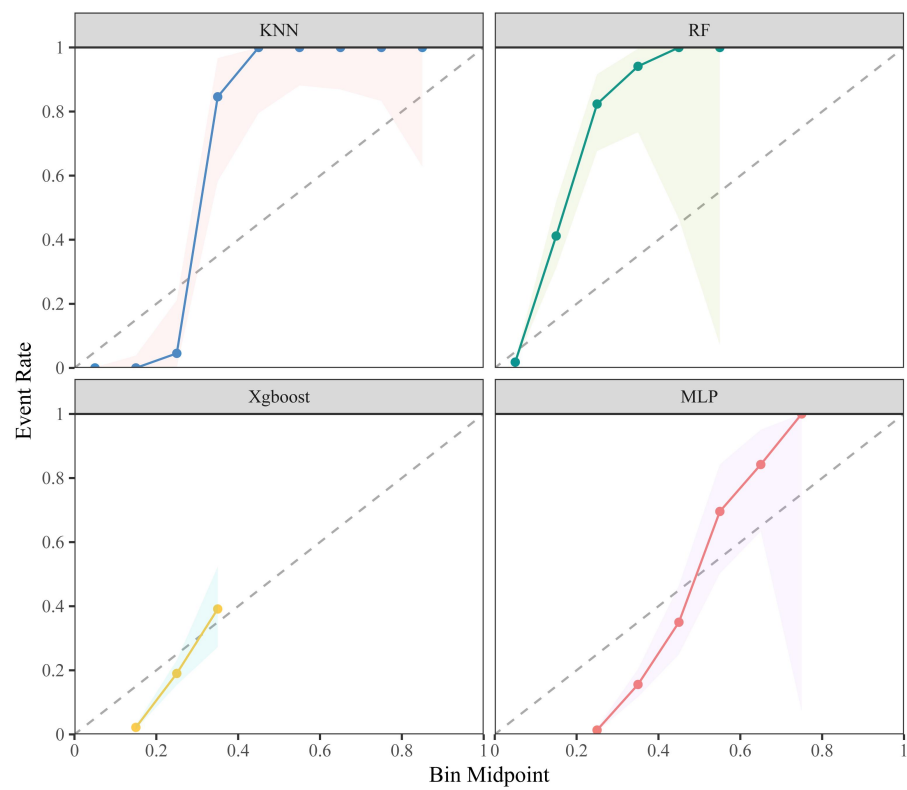

**Figure S4:** Calibration plots of machine learning algorithms in the test set.

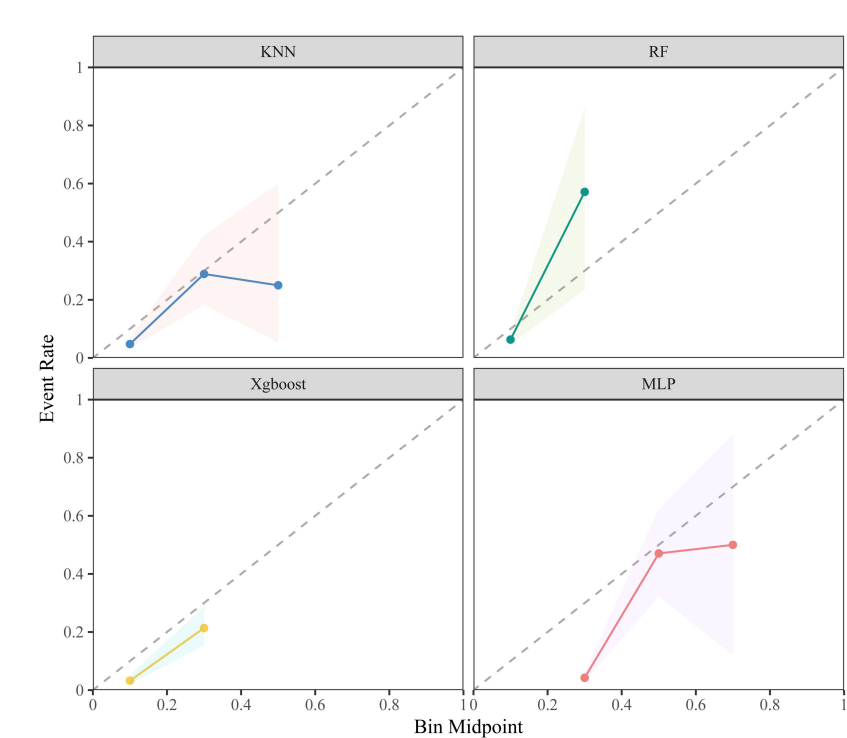

**Figure S5:** Cross-validation ROC and PR AUC plots of machine learning models:  
ROC

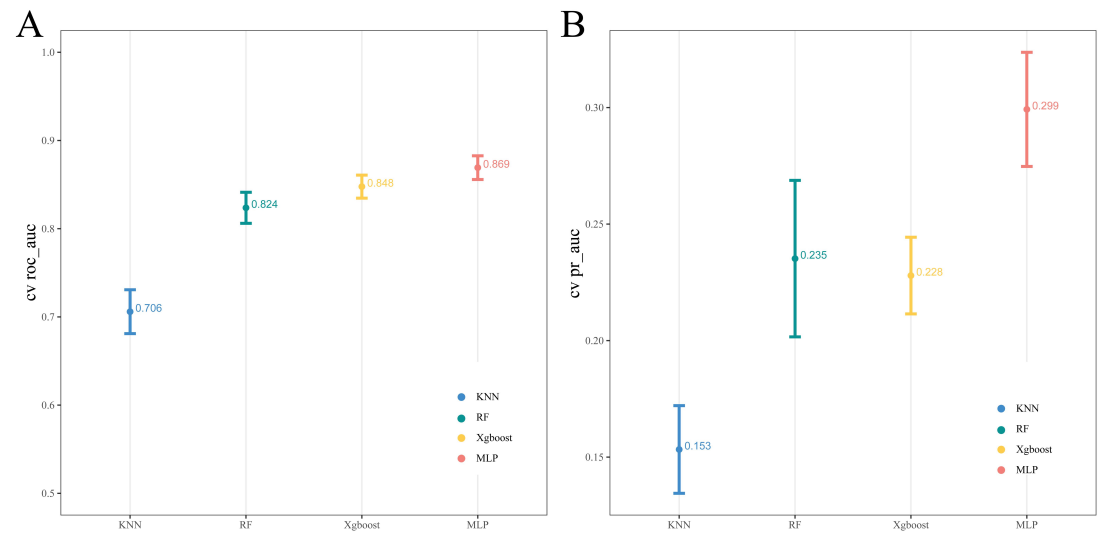

AUC plots (A), PR AUC plots (B).

**Figure S6:** Visualization of hyperparameter tuning results for the MLP model.

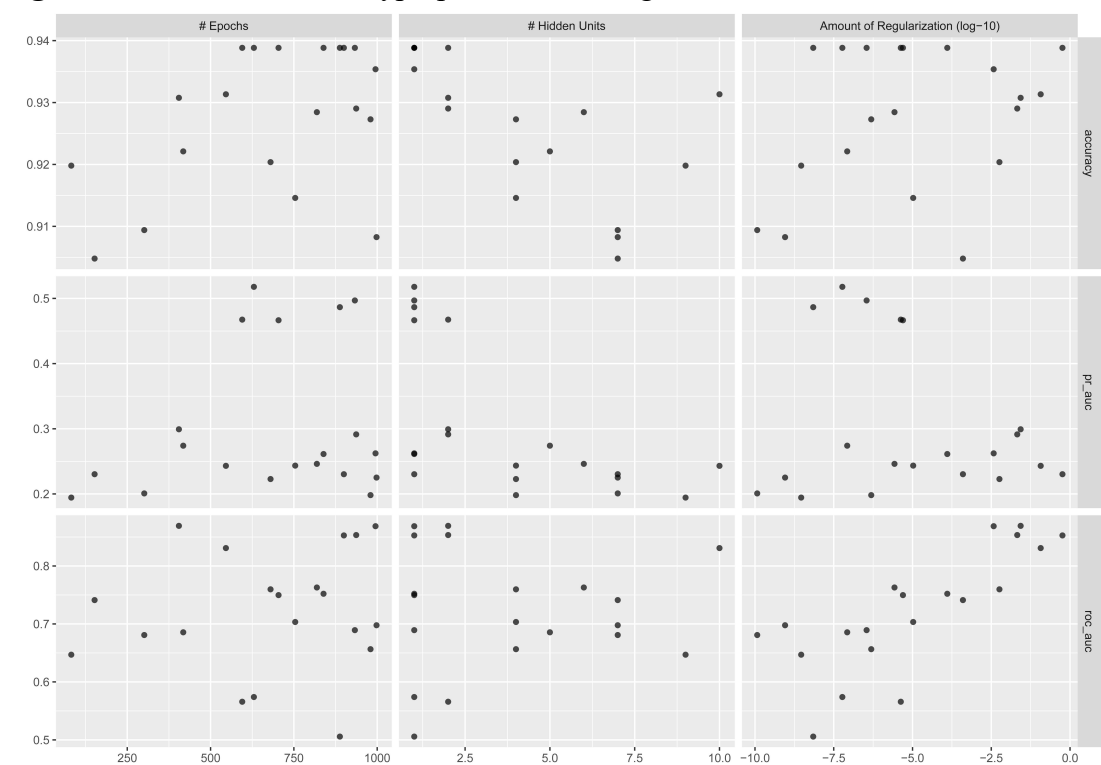

**Figure S7.** Illustration of the neural network structure. The numbers of input, hidden, and output layers are 1, 2, and 1, respectively.

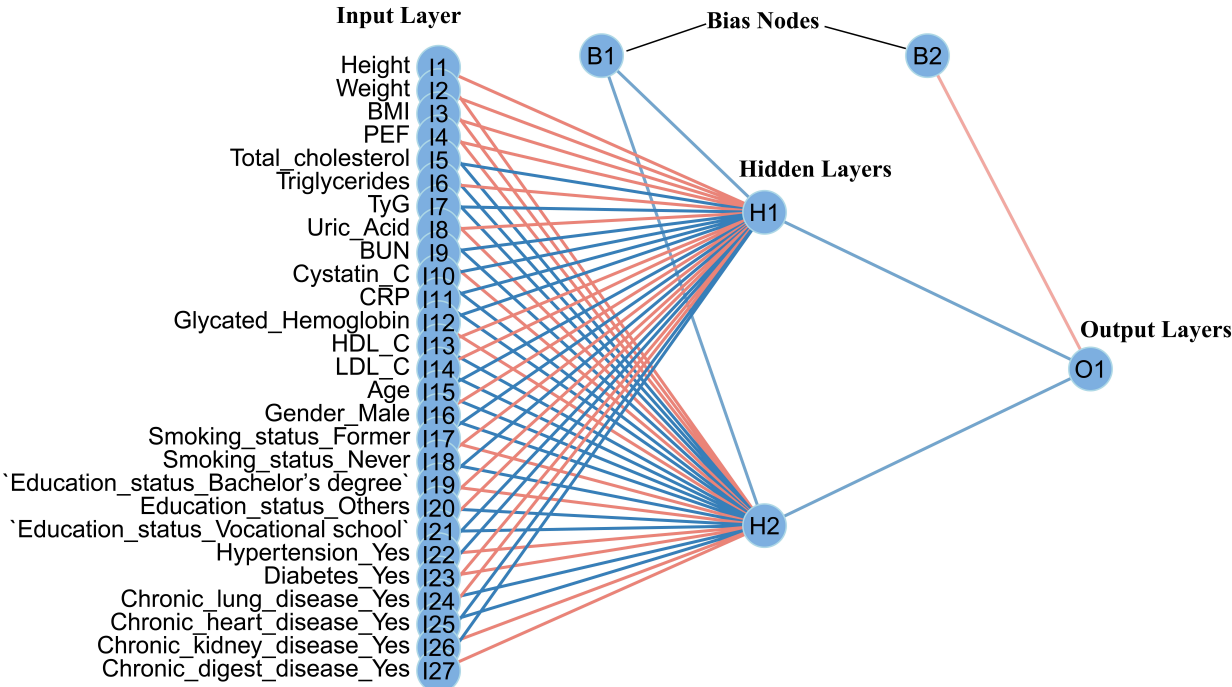

Supplement: Supplementary file 1 [file e65987e24931aa4a356ec66e.pdf]
