# Supplementary material for: Intelligent Predictive Risk Assessment and Management of Sarcopenia in Chronic Disease Patients Using Machine Learning and a Web-Based Tool
Source: Research Square preprint supplement (doi:10.21203/rs.3.rs-6161594/v1), 2025-04-15
Supplement: Supplementary file 1 [file 212b5559480a58844fe0ab10.xlsx]

## Sheet: Table S1
Table S1. Baseline characteristics of individuals with chronic diseases using quantile category
Characteristics	Feature	Non-sarcopenia (N=4564)	Sarcopenia (N=1218)	p value
wave	1	2311 (50.6%)	580 (47.6%)	.066
	3	2253 (49.4%)	638 (52.4%)
Gender	Female	2009 (44%)	583 (47.9%)	.018
	Male	2555 (56%)	635 (52.1%)
Smoking_status	Current	1159 (25.4%)	393 (32.3%)	<.001
	Former	621 (13.6%)	158 (13%)
	Never	2784 (61%)	667 (54.8%)
Education_status	Associate degree	1096 (24%)	288 (23.6%)	<.001
	Bachelor’s degree	970 (21.3%)	132 (10.8%)
	Others	410 (9%)	52 (4.3%)
	Vocational school	2088 (45.7%)	746 (61.2%)
Hypertension	No	2460 (53.9%)	835 (68.6%)	<.001
	Yes	2104 (46.1%)	383 (31.4%)
Diabetes	No	3962 (86.8%)	1136 (93.3%)	<.001
	Yes	602 (13.2%)	82 (6.7%)
Chronic_lung_disease	No	3912 (85.7%)	931 (76.4%)	<.001
	Yes	652 (14.3%)	287 (23.6%)
Chronic_heart_disease	No	3464 (75.9%)	1003 (82.3%)	<.001
	Yes	1100 (24.1%)	215 (17.7%)
Chronic_psychiatric_disorders	No	4459 (97.7%)	1192 (97.9%)	.812
	Yes	105 (2.3%)	26 (2.1%)
Chronic_liver_disease	No	4284 (93.9%)	1132 (92.9%)	.266
	Yes	280 (6.1%)	86 (7.1%)
Chronic_kidney_disease	No	4066 (89.1%)	1073 (88.1%)	.353
	Yes	498 (10.9%)	145 (11.9%)
Chronic_digest_disease	No	2924 (64.1%)	694 (57%)	<.001
	Yes	1640 (35.9%)	524 (43%)
Height, m	Q1 [1.08, 1.51]	939 (20.6%)	537 (44.1%)	<.001
	Q2 [1.51, 1.57]	1124 (24.6%)	300 (24.6%)
	Q3 [1.57, 1.63]	1187 (26%)	260 (21.3%)
	Q4 [1.63, 1.92]	1314 (28.8%)	121 (9.9%)
Weight, kg	Q1 [28.1, 51.6]	381 (8.3%)	1071 (87.9%)	<.001
	Q2 [51.6, 58.8]	1303 (28.5%)	147 (12.1%)
	Q3 [58.8, 66.9]	1439 (31.5%)	0 (0%)
	Q4 [66.9, 162]	1441 (31.6%)	0 (0%)
BMI, kg/m²	Q1 [12.97, 22.02]	826 (18.1%)	1101 (90.4%)	<.001
	Q2 [22.02, 25.36]	1813 (39.7%)	114 (9.4%)
	Q3 [25.36, 71.21]	1924 (42.2%)	3 (0.2%)
PEF, L/min	Q1 [30, 200]	1009 (22.1%)	515 (42.3%)	<.001
	Q2 [200, 280]	1079 (23.6%)	329 (27%)
	Q3 [280, 360]	1201 (26.3%)	217 (17.8%)
	Q4 [360, 890]	1275 (27.9%)	157 (12.9%)
Total_cholesterol, mg/dl	Q1 [23.97, 164.09]	1104 (24.2%)	349 (28.7%)	.001
	Q2 [164.09, 186.49]	1124 (24.6%)	315 (25.9%)
	Q3 [186.49, 211.97]	1155 (25.3%)	291 (23.9%)
	Q4 [211.97, 616.6]	1181 (25.9%)	263 (21.6%)
Triglycerides, mg/dl	Q1 [21.24, 80.54]	968 (21.2%)	486 (39.9%)	<.001
	Q2 [80.54, 114.17]	1087 (23.8%)	361 (29.6%)
	Q3 [114.17, 168.14]	1207 (26.4%)	236 (19.4%)
	Q4 [168.14, 1235.46]	1302 (28.5%)	135 (11.1%)
TyG	Q1 [6.62, 8.27]	971 (21.3%)	475 (39%)	<.001
	Q2 [8.27, 8.66]	1095 (24%)	350 (28.7%)
	Q3 [8.66, 9.11]	1191 (26.1%)	254 (20.9%)
	Q4 [9.11, 11.99]	1307 (28.6%)	139 (11.4%)
Uric_Acid, mg/dl	Q1 [1, 3.71]	1095 (24%)	351 (28.8%)	.003
	Q2 [3.71, 4.5]	1142 (25%)	309 (25.4%)
	Q3 [4.5, 5.42]	1160 (25.4%)	280 (23%)
	Q4 [5.42, 12.3]	1167 (25.6%)	278 (22.8%)
BUN, mg/dl	Q1 [5.07, 12.61]	1179 (25.8%)	279 (22.9%)	<.001
	Q2 [12.61, 15.15]	1187 (26%)	255 (20.9%)
	Q3 [15.15, 18.49]	1183 (25.9%)	301 (24.7%)
	Q4 [18.49, 54.34]	1015 (22.2%)	383 (31.4%)
Cystatin_C, mg/l	Q1 [0.4, 0.8]	1284 (28.1%)	244 (20%)	<.001
	Q2 [0.8, 0.93]	1224 (26.8%)	267 (21.9%)
	Q3 [0.93, 1.05]	1023 (22.4%)	316 (25.9%)
	Q4 [1.05, 5.97]	1033 (22.6%)	391 (32.1%)
CRP, mg/l	Q1 [0.01, 0.65]	1038 (22.7%)	412 (33.8%)	<.001
	Q2 [0.65, 1.27]	1125 (24.6%)	318 (26.1%)
	Q3 [1.27, 2.5]	1236 (27.1%)	239 (19.6%)
	Q4 [2.5, 132.9]	1165 (25.5%)	249 (20.4%)
Glycated_Hemoglobin, %	Q1 [3.5, 5.1]	1180 (25.9%)	328 (26.9%)	<.001
	Q2 [5.1, 5.5]	1178 (25.8%)	331 (27.2%)
	Q3 [5.5, 5.9]	1005 (22%)	316 (25.9%)
	Q4 [5.9, 17.1]	1201 (26.3%)	243 (20%)
HDL_C, mg/dl	Q1 [6.18, 41.7]	1302 (28.5%)	167 (13.7%)	<.001
	Q2 [41.7, 49.07]	1195 (26.2%)	227 (18.6%)
	Q3 [49.07, 57.92]	1139 (25%)	307 (25.2%)
	Q4 [57.92, 151.35]	928 (20.3%)	517 (42.4%)
LDL_C, mg/dl	Q1 [0.39, 87.37]	1091 (23.9%)	360 (29.6%)	<.001
	Q2 [87.37, 107.72]	1131 (24.8%)	320 (26.3%)
	Q3 [107.72, 129.51]	1153 (25.3%)	286 (23.5%)
	Q4 [129.51, 385.83]	1189 (26.1%)	252 (20.7%)
Age, year	Q1 [17, 55]	1432 (31.4%)	107 (8.8%)	<.001
	Q2 [55, 62]	1344 (29.4%)	223 (18.3%)
	Q3 [62, 69]	1042 (22.8%)	363 (29.8%)
	Q4 [69, 94]	746 (16.3%)	525 (43.1%)

## Sheet: Table S2
Table S2. Results of the generalized linear mixed model for fixed effects
Characteristics	Coefficient	Standard error	Z-statistic	P value	CI lower limit	CI upper limit
(Intercept)	-10.0345	0.42716	-23.4912	5.02324e-122	-10.8717	-9.19726
wave	0.30751	0.129253	2.37914	0.0173532	0.0541794	0.560842
GenderMale	-0.922483	0.547495	-1.68492	0.0920048	-1.99555	0.150588
wave:GenderMale	0.30685	0.18524	1.6565	0.0976205	-0.0562136	0.669915
(Intercept)	-9.38699	0.448761	-20.9176	3.70473e-97	-10.2665	-8.50744
wave	0.16247	0.154864	1.04911	0.294128	-0.141059	0.465998
Smoking_statusFormer	-2.64291	1.16404	-2.27045	0.0231801	-4.92439	-0.361423
Smoking_statusNever	-1.68341	0.56032	-3.00437	0.00266129	-2.78162	-0.585203
wave:Smoking_statusFormer	0.83425	0.410465	2.03245	0.0421079	0.0297539	1.63875
wave:Smoking_statusNever	0.433152	0.20291	2.13471	0.0327849	0.0354571	0.830848
(Intercept)	-8.23164	0.469215	-17.5434	6.67941e-69	-9.15128	-7.31199
wave	0.123629	0.156185	0.791555	0.42862	-0.182488	0.429746
Education_statusBachelor’s degree	-3.89195	1.02188	-3.80863	0.000139741	-5.89479	-1.88911
Education_statusOthers	-17.5477	4.34151	-4.04184	5.30325e-05	-26.0569	-9.0385
Education_statusVocational school	-0.504673	0.511652	-0.986361	0.323956	-1.50749	0.498146
wave:Education_statusBachelor’s degree	1.21658	0.347461	3.50136	0.000462889	0.535575	1.8976
wave:Education_statusOthers	-0.21827	0.459561	-0.474953	0.63482	-1.11899	0.682453
wave:Education_statusVocational school	0.336461	0.187531	1.79416	0.0727871	-0.0310927	0.704014
(Intercept)	-10.0367	0.376179	-26.6806	7.89698e-157	-10.774	-9.29939
wave	0.440084	0.110747	3.97378	7.07407e-05	0.223024	0.657145
HypertensionYes	-1.50944	0.624732	-2.41615	0.0156857	-2.7339	-0.284993
wave:HypertensionYes	0.216939	0.214077	1.01337	0.310884	-0.202645	0.636523
(Intercept)	-10.3806	0.349178	-29.7287	3.27418e-194	-11.065	-9.69622
wave	0.398538	0.0958982	4.15584	3.24094e-05	0.210581	0.586495
DiabetesYes	-10.8978	1.69019	-6.44767	1.13583e-10	-14.2105	-7.58508
wave:DiabetesYes	3.35428	0.548181	6.11893	9.42054e-10	2.27986	4.42869
(Intercept)	-10.4015	0.360043	-28.8896	1.61469e-183	-11.1072	-9.69582
wave	0.392734	0.102169	3.84396	0.000121066	0.192486	0.592983
Chronic_lung_diseaseYes	-0.404488	0.789864	-0.512098	0.608582	-1.95259	1.14362
wave:Chronic_lung_diseaseYes	0.331526	0.262809	1.26147	0.20714	-0.183571	0.846622
(Intercept)	-10.1324	0.351306	-28.842	6.39282e-183	-10.8209	-9.44381
wave	0.303119	0.100737	3.009	0.00262109	0.105677	0.500561
Chronic_heart_diseaseYes	-5.69309	1.35104	-4.21384	2.51064e-05	-8.34109	-3.04509
wave:Chronic_heart_diseaseYes	1.84476	0.445711	4.1389	3.48968e-05	0.971178	2.71833
(Intercept)	-10.4723	0.35096	-29.8391	1.2158e-195	-11.1602	-9.78446
wave	0.44922	0.0937441	4.79198	1.65139e-06	0.265485	0.632955
Chronic_psychiatric_disordersYes	-4.04718	4.43216	-0.91314	0.361169	-12.7341	4.63969
wave:Chronic_psychiatric_disordersYes	1.4411	1.46834	0.981452	0.32637	-1.43679	4.31899
(Intercept)	-10.5736	0.359308	-29.4277	2.42841e-190	-11.2778	-9.86938
wave	0.494581	0.0967775	5.11049	3.2132e-07	0.3049	0.684261
Chronic_liver_diseaseYes	1.5005	1.0693	1.40326	0.16054	-0.595286	3.59629
wave:Chronic_liver_diseaseYes	-0.578692	0.381927	-1.51519	0.129724	-1.32725	0.169871
(Intercept)	-10.4669	0.360429	-29.0401	2.05431e-185	-11.1733	-9.76046
wave	0.421248	0.0989901	4.25545	2.08626e-05	0.227231	0.615265
Chronic_kidney_diseaseYes	-0.156752	0.972447	-0.161193	0.871941	-2.06271	1.74921
wave:Chronic_kidney_diseaseYes	0.250707	0.33024	0.759166	0.447753	-0.396551	0.897965
(Intercept)	-10.5499	0.399845	-26.385	2.03634e-153	-11.3336	-9.76624
wave	0.463834	0.121087	3.8306	0.000127832	0.226509	0.701159
Chronic_digest_diseaseYes	0.240686	0.554061	0.434404	0.663995	-0.845253	1.32663
wave:Chronic_digest_diseaseYes	-0.033439	0.196901	-0.169826	0.865147	-0.419359	0.352481
(Intercept)	-8.74605	0.459066	-19.0518	6.34384e-81	-9.6458	-7.84629
wave	0.380342	0.140137	2.71407	0.00664612	0.105679	0.655005
Height_QuartileQ2	-1.07463	0.640346	-1.6782	0.093308	-2.32968	0.180426
Height_QuartileQ3	-0.405957	0.606466	-0.669382	0.503252	-1.59461	0.782695
Height_QuartileQ4	-1.91437	0.787311	-2.43153	0.0150354	-3.45747	-0.371266
wave:Height_QuartileQ2	0.00436979	0.236198	0.0185006	0.98524	-0.458569	0.467309
wave:Height_QuartileQ3	-0.351069	0.230524	-1.52292	0.127779	-0.802888	0.10075
wave:Height_QuartileQ4	-0.166041	0.288691	-0.575152	0.565189	-0.731866	0.399783
(Intercept)	6.90349	0.873539	7.9029	2.72495e-15	5.19138	8.61559
wave	0.753015	0.155799	4.83324	1.34328e-06	0.447654	1.05838
Weight_QuartileQ2	-18.0174	1.57335	-11.4516	2.3082e-30	-21.1011	-14.9337
Weight_QuartileQ3	-3869.87	3.81904e+06	-0.00101331	0.999191	-7.48905e+06	7.48131e+06
Weight_QuartileQ4	-340.382	3.97872e+06	-8.55506e-05	0.999932	-7.79849e+06	7.79781e+06
wave:Weight_QuartileQ2	-0.0308797	0.252879	-0.122112	0.90281	-0.526514	0.464755
(Intercept)	7.70029	0.426208	18.067	5.80165e-73	6.86494	8.53564
wave	0.603762	0.165374	3.65089	0.000261331	0.279635	0.927888
BMI_QuartileQ2	-20.1837	1.14193	-17.6751	6.52773e-70	-22.4219	-17.9456
BMI_QuartileQ3	-37.6852	3.27194	-11.5177	1.0747e-30	-44.0981	-31.2723
wave:BMI_QuartileQ2	0.544554	0.33544	1.6234	0.104504	-0.112897	1.20201
wave:BMI_QuartileQ3	3.22908	0.856434	3.77038	0.000162997	1.5505	4.90766
(Intercept)	-9.70322	0.462416	-20.9838	9.23174e-98	-10.6095	-8.79691
wave	0.576785	0.15981	3.60919	0.00030715	0.263563	0.890006
PEF_QuartileQ2	-0.267401	0.651917	-0.410177	0.681676	-1.54513	1.01033
PEF_QuartileQ3	-0.958063	0.716462	-1.33721	0.181153	-2.3623	0.446178
PEF_QuartileQ4	-2.36933	0.889299	-2.66426	0.00771573	-4.11232	-0.626332
wave:PEF_QuartileQ2	-0.243312	0.27072	-0.898758	0.368781	-0.773913	0.287289
wave:PEF_QuartileQ3	-0.153792	0.286534	-0.536734	0.591452	-0.715388	0.407804
wave:PEF_QuartileQ4	0.0867569	0.329394	0.263383	0.792255	-0.558844	0.732357
(Intercept)	-7.69015	0.410871	-18.7167	3.61877e-78	-8.49544	-6.88486
wave	-0.342689	0.164987	-2.07707	0.0377955	-0.666058	-0.0193202
Total_cholesterol_QuartileQ2	-0.94306	0.59598	-1.58237	0.113565	-2.11116	0.225039
Total_cholesterol_QuartileQ3	-3.50944	0.717008	-4.89456	9.85269e-07	-4.91474	-2.10413
Total_cholesterol_QuartileQ4	-5.92383	0.89936	-6.58672	4.49652e-11	-7.68655	-4.16112
wave:Total_cholesterol_QuartileQ2	0.221292	0.26547	0.833585	0.404515	-0.29902	0.741603
wave:Total_cholesterol_QuartileQ3	1.2528	0.289442	4.32833	1.50245e-05	0.685505	1.8201
wave:Total_cholesterol_QuartileQ4	1.9895	0.33565	5.92732	3.07914e-09	1.33164	2.64737
(Intercept)	-8.13092	0.388526	-20.9276	3.00137e-97	-8.89242	-7.36942
wave	0.054841	0.154026	0.35605	0.721803	-0.247045	0.356727
Triglycerides_QuartileQ2	0.273444	0.522884	0.522953	0.601007	-0.751389	1.29828
Triglycerides_QuartileQ3	-10.2578	0.992334	-10.337	4.79081e-25	-12.2027	-8.31286
Triglycerides_QuartileQ4	-0.255878	0.786511	-0.325334	0.744929	-1.79741	1.28565
wave:Triglycerides_QuartileQ2	-0.260199	0.241062	-1.07938	0.280416	-0.732672	0.212274
wave:Triglycerides_QuartileQ3	3.25872	0.369603	8.81683	1.17745e-18	2.53432	3.98313
wave:Triglycerides_QuartileQ4	-1.62517	0.399111	-4.07198	4.66147e-05	-2.40741	-0.842929
(Intercept)	-9.60019	0.479574	-20.0182	3.82552e-89	-10.5401	-8.66024
wave	0.452897	0.167501	2.70385	0.00685406	0.124602	0.781192
TyG_QuartileQ2	-0.748672	0.673203	-1.1121	0.266093	-2.06812	0.570781
TyG_QuartileQ3	-2.35831	0.788599	-2.9905	0.00278519	-3.90393	-0.812682
TyG_QuartileQ4	-1.18688	0.823784	-1.44077	0.14965	-2.80147	0.427706
wave:TyG_QuartileQ2	0.00516752	0.275283	0.0187717	0.985023	-0.534378	0.544713
wave:TyG_QuartileQ3	0.515884	0.309579	1.6664	0.0956333	-0.0908807	1.12265
wave:TyG_QuartileQ4	-0.509558	0.327702	-1.55494	0.11996	-1.15184	0.132727
(Intercept)	-6.74374	0.338937	-19.8967	4.34499e-88	-7.40804	-6.07943
wave	-0.813119	0.191592	-4.24401	2.19559e-05	-1.18863	-0.437605
Uric_Acid_QuartileQ2	-5.324	0.754868	-7.05288	1.75246e-12	-6.80351	-3.84448
Uric_Acid_QuartileQ3	-4.85151	0.767596	-6.3204	2.60889e-10	-6.35597	-3.34705
Uric_Acid_QuartileQ4	-2.95614	0.665172	-4.44418	8.82266e-06	-4.25986	-1.65243
wave:Uric_Acid_QuartileQ2	2.25748	0.32869	6.8681	6.50647e-12	1.61326	2.9017
wave:Uric_Acid_QuartileQ3	1.71521	0.323526	5.30163	1.14776e-07	1.08111	2.34931
wave:Uric_Acid_QuartileQ4	1.06052	0.282523	3.75375	0.000174207	0.506787	1.61426
(Intercept)	-4.97758	0.313427	-15.8811	8.56234e-57	-5.59189	-4.36328
wave	-0.30099	0.128415	-2.34389	0.0190837	-0.552678	-0.0493019
BUN_QuartileQ2	-0.658842	0.451943	-1.4578	0.144896	-1.54463	0.22695
BUN_QuartileQ3	-4.13545	0.570983	-7.24269	4.39868e-13	-5.25456	-3.01635
BUN_QuartileQ4	-3.0371	0.494666	-6.1397	8.26771e-10	-4.00663	-2.06757
wave:BUN_QuartileQ2	-0.174778	0.212269	-0.823377	0.410294	-0.590818	0.241263
wave:BUN_QuartileQ3	1.39051	0.228589	6.08302	1.17942e-09	0.942483	1.83853
wave:BUN_QuartileQ4	1.12475	0.199525	5.63716	1.72881e-08	0.733691	1.51581
(Intercept)	-10.0456	0.704781	-14.2535	4.26449e-46	-11.4269	-8.66424
wave	0.792076	0.234772	3.37381	0.000741347	0.331932	1.25222
Cystatin_C_QuartileQ2	-1.22289	0.99137	-1.23354	0.217375	-3.16594	0.720156
Cystatin_C_QuartileQ3	2.16676	0.793514	2.73058	0.00632221	0.611499	3.72202
Cystatin_C_QuartileQ4	1.95162	0.775787	2.51567	0.0118806	0.431111	3.47214
wave:Cystatin_C_QuartileQ2	0.151091	0.358369	0.421606	0.673312	-0.5513	0.853482
wave:Cystatin_C_QuartileQ3	-0.945749	0.309798	-3.05279	0.00226725	-1.55294	-0.338555
wave:Cystatin_C_QuartileQ4	-1.39716	0.326097	-4.2845	1.83151e-05	-2.0363	-0.758024
(Intercept)	-8.34931	0.387839	-21.5278	8.55142e-103	-9.10946	-7.58916
wave	0.0647568	0.164279	0.394189	0.693442	-0.257223	0.386737
CRP_QuartileQ2	-2.25325	0.641725	-3.51123	0.000446035	-3.51101	-0.995488
CRP_QuartileQ3	-6.54297	1.13337	-5.77305	7.78508e-09	-8.76433	-4.32162
CRP_QuartileQ4	-1.21741	0.653556	-1.86274	0.0624983	-2.49836	0.0635388
wave:CRP_QuartileQ2	0.878276	0.27439	3.20083	0.00137033	0.340481	1.41607
wave:CRP_QuartileQ3	2.11061	0.410473	5.14189	2.71995e-07	1.30609	2.91512
wave:CRP_QuartileQ4	0.0643192	0.275069	0.23383	0.815117	-0.474806	0.603444
(Intercept)	-10.3078	0.500036	-20.6142	2.04694e-94	-11.2879	-9.32778
wave	1.65836	0.343637	4.82591	1.39368e-06	0.984845	2.33188
Glycated_Hemoglobin_QuartileQ2	1.25337	0.62694	1.99919	0.0455877	0.0245928	2.48215
Glycated_Hemoglobin_QuartileQ3	0.50123	0.87068	0.575677	0.564834	-1.20527	2.20773
Glycated_Hemoglobin_QuartileQ4	-24.0519	5.3059	-4.53304	5.81401e-06	-34.4513	-13.6525
wave:Glycated_Hemoglobin_QuartileQ2	-1.49123	0.402707	-3.70301	0.000213053	-2.28052	-0.701939
wave:Glycated_Hemoglobin_QuartileQ3	-1.12217	0.435189	-2.57857	0.00992096	-1.97512	-0.269212
wave:Glycated_Hemoglobin_QuartileQ4	6.90861	1.79128	3.8568	0.000114882	3.39776	10.4195
(Intercept)	-13.3782	0.896838	-14.9171	2.55096e-50	-15.136	-11.6205
wave	1.49736	0.301397	4.96807	6.76234e-07	0.906634	2.08809
HDL_C_QuartileQ2	4.89796	1.00481	4.87449	1.09087e-06	2.92856	6.86735
HDL_C_QuartileQ3	2.68098	1.00642	2.66388	0.00772462	0.708432	4.65353
HDL_C_QuartileQ4	3.67774	0.913934	4.02408	5.71995e-05	1.88646	5.46902
wave:HDL_C_QuartileQ2	-1.92405	0.406725	-4.73059	2.23866e-06	-2.72122	-1.12688
wave:HDL_C_QuartileQ3	-1.01175	0.376892	-2.68446	0.00726467	-1.75045	-0.273058
wave:HDL_C_QuartileQ4	-0.786402	0.333951	-2.35485	0.0185304	-1.44093	-0.131871
(Intercept)	-9.36236	0.53093	-17.6339	1.35363e-69	-10.403	-8.32176
wave	0.184515	0.184753	0.998715	0.317933	-0.177593	0.546624
LDL_C_QuartileQ2	-1.12633	0.745447	-1.51095	0.130801	-2.58738	0.334715
LDL_C_QuartileQ3	-0.681065	0.726881	-0.936969	0.348774	-2.10573	0.743595
LDL_C_QuartileQ4	-2.27645	0.741547	-3.06987	0.00214154	-3.72985	-0.823045
wave:LDL_C_QuartileQ2	0.232499	0.297928	0.780385	0.435164	-0.35143	0.816427
wave:LDL_C_QuartileQ3	0.0445216	0.295313	0.150761	0.880164	-0.534281	0.623324
wave:LDL_C_QuartileQ4	0.612079	0.296882	2.06169	0.0392372	0.0302007	1.19396
(Intercept)	-11.2026	0.694992	-16.119	1.87675e-58	-12.5647	-9.84041
wave	0.361289	0.269989	1.33816	0.180844	-0.16788	0.890458
Age_QuartileQ2	1.5584	0.832696	1.87151	0.0612739	-0.0736522	3.19046
Age_QuartileQ3	2.19616	0.809384	2.71338	0.00666009	0.609802	3.78253
Age_QuartileQ4	1.36785	0.867143	1.57742	0.114698	-0.331718	3.06742
wave:Age_QuartileQ2	-0.372265	0.35807	-1.03964	0.298505	-1.07407	0.329539
wave:Age_QuartileQ3	-0.174678	0.326304	-0.535322	0.592427	-0.814221	0.464866
wave:Age_QuartileQ4	0.38347	0.324392	1.18212	0.237159	-0.252327	1.01927

## Sheet: Table S3
Table S3. Baseline comparison between train set and test set
Variable	Feature	Train set (N=1733)	Test set (N=578)	P value
Sarcopenia	No	1627 (93.9%)	538 (93.1%)	.556
	Yes	106 (6.1%)	40 (6.9%)
Gender	Female	761 (43.9%)	253 (43.8%)	.992
	Male	972 (56.1%)	325 (56.2%)
Smoking_status	Current	470 (27.1%)	146 (25.3%)	.336
	Former	159 (9.2%)	64 (11.1%)
	Never	1104 (63.7%)	368 (63.7%)
Height, m	Mean ± SD	1.6 ± 0.1	1.6 ± 0.1	.691
Weight, kg	Mean ± SD	63.0 ± 9.8	62.8 ± 9.7	.590
BMI, kg/m²	Mean ± SD	25.0 ± 3.6	24.9 ± 3.5	.355
PEF, L/min	Mean ± SD	294.3 ± 121.5	295.1 ± 121.2	.889
Total_cholesterol, mg/dl	Mean ± SD	195.3 ± 38.8	193.8 ± 36.0	.372
Triglycerides, mg/dl	Mean ± SD	142.4 ± 103.1	144.3 ± 99.3	.700
TyG	Mean ± SD	8.8 ± 0.7	8.8 ± 0.6	.757
Uric_Acid, mg/dl	Mean ± SD	4.5 ± 1.3	4.4 ± 1.2	.430
BUN, mg/dl	Mean ± SD	15.7 ± 4.4	15.5 ± 4.1	.262
Cystatin_C, mg/l	Mean ± SD	1.0 ± 0.3	1.0 ± 0.2	.722
CRP, mg/l	Mean ± SD	2.6 ± 5.5	2.4 ± 5.7	.400
Glycated_Hemoglobin, %	Mean ± SD	5.4 ± 0.9	5.3 ± 0.7	.029
HDL_C, mg/dl	Mean ± SD	48.7 ± 14.0	48.2 ± 13.7	.496
LDL_C, mg/dl	Mean ± SD	118.2 ± 36.0	117.3 ± 34.4	.601
Age, year	Mean ± SD	58.6 ± 8.7	57.9 ± 8.5	.082
Education_status	Associate degree	417 (24.1%)	136 (23.5%)	.908
	Bachelor’s degree	373 (21.5%)	118 (20.4%)
	Others	153 (8.8%)	54 (9.3%)
	Vocational school	790 (45.6%)	270 (46.7%)
Hypertension	No	1005 (58%)	342 (59.2%)	.654
	Yes	728 (42%)	236 (40.8%)
Diabetes	No	1541 (88.9%)	522 (90.3%)	.391
	Yes	192 (11.1%)	56 (9.7%)
Chronic_lung_disease	No	1534 (88.5%)	504 (87.2%)	.437
	Yes	199 (11.5%)	74 (12.8%)
Chronic_heart_disease	No	1377 (79.5%)	464 (80.3%)	.716
	Yes	356 (20.5%)	114 (19.7%)
Chronic_psychiatric_disorders	No	1706 (98.4%)	567 (98.1%)	.707
	Yes	27 (1.6%)	11 (1.9%)
Chronic_liver_disease	No	1664 (96%)	555 (96%)	1.000
	Yes	69 (4%)	23 (4%)
Chronic_kidney_disease	No	1580 (91.2%)	531 (91.9%)	.667
	Yes	153 (8.8%)	47 (8.1%)
Chronic_digest_disease	No	1203 (69.4%)	383 (66.3%)	.173
	Yes	530 (30.6%)	195 (33.7%)

## Sheet: Table S4
Table S4. Comprehensive model performance
Trainset	Model	Best cutoff	Accuracy	Kapa	Sensitivity	Specificity	PPV	NPV	MCC	J index	Bal accuracy	Detection prevalence	Precision	Recall	F means	ROAUC	PRAUC
Train set	KNN	0.298576	0.998846	0.990039	1	0.998771	0.981481	1	0.990088	0.998771	0.999385	0.0623197	0.981481	1	0.990654	0.999983	0.999735
Train set	RF	0.0371991	0.892095	0.485071	1	0.885065	0.361775	1	0.565857	0.885065	0.942532	0.169071	0.361775	1	0.531328	0.97992	0.778288
Train set	Xgboost	0.164003	0.731102	0.208449	0.896226	0.720344	0.172727	0.990702	0.317436	0.616571	0.808285	0.317369	0.172727	0.896226	0.289634	0.879568	0.291185
Train set	MLP	0.292991	0.836122	0.32974	0.867925	0.83405	0.254144	0.989788	0.413805	0.701975	0.850987	0.208886	0.254144	0.867925	0.393162	0.927909	0.576547
Test set	KNN	0.298576	0.915225	0.18083	0.175	0.97026	0.304348	0.940541	0.188607	0.14526	0.57263	0.0397924	0.304348	0.175	0.222222	0.811036	0.244296
Test set	RF	0.0371991	0.851211	0.385471	0.875	0.849442	0.301724	0.989177	0.459066	0.724442	0.862221	0.200692	0.301724	0.875	0.448718	0.882505	0.399689
Test set	Xgboost	0.164003	0.733564	0.230985	0.9	0.72119	0.193548	0.989796	0.337478	0.62119	0.810595	0.321799	0.193548	0.9	0.318584	0.869888	0.284838
Test set	MLP	0.292991	0.846021	0.375567	0.875	0.843866	0.294118	0.989107	0.451221	0.718866	0.859433	0.205882	0.294118	0.875	0.440252	0.911757	0.400563
Abbreviation: PPV: Positive Predictive Value; NPV: Negative Predictive Value; MCC: Matthews Correlation Coefficient; J index: Youden's Index; Bal accuracy: Balanced Accuracy; Detection prevalence: Detection Prevalence; Precision: Precision (Positive Predictive Value); Recall: Recall (Sensitivity); F means: F-Measure (F1 Score); ROAUC: Receiver Operating Characteristic Area Under the Curve; PRAUC:…
